1 **Unbiased proteomic and forward genetic screens reveal that mechanosensitive ion**  
2 **channel MSL10 functions at ER-plasma membrane contact sites in *Arabidopsis thaliana***

3

4 Jennette M. Codjoe<sup>1</sup>, Ryan A. Richardson<sup>1</sup>, and Elizabeth S. Haswell<sup>1,2</sup>

5

6 <sup>1</sup>Department of Biology and NSF Center for Engineering Mechanobiology, Washington  
7 University in St. Louis, St. Louis, MO, USA.

8 <sup>2</sup>Corresponding author, ehaswell@wustl.edu

9

10 **ABSTRACT**

11 Mechanosensitive (MS) ion channels are an evolutionarily conserved way for cells to sense  
12 mechanical forces and transduce them into ionic signals. The channel properties of *Arabidopsis*  
13 *thaliana* MscS-Like (MSL)10 have been well studied, but how MSL10 signals remains largely  
14 unknown. To uncover signaling partners of MSL10, we employed both a proteomic screen and a  
15 forward genetic screen; both unexpectedly implicated ER-plasma membrane contact sites  
16 (EPCSs) in MSL10 function. The proteomic screen revealed that MSL10 associates with  
17 multiple proteins associated with EPCSs. Of these, only VAMP-associated proteins (VAP)27-1  
18 and VAP27-3 interacted directly with MSL10. The forward genetic screen, for suppressors of a  
19 gain-of-function *MSL10* allele (*msl10-3G*, *MSL10<sup>S640L</sup>*), identified mutations in the *synaptotagmin*  
20 (*SYT*)5 and *SYT*7 genes. We also found that EPCSs were expanded in leaves of *msl10-3G*  
21 plants compared to the wild type. Taken together, these results indicate that MSL10 can be  
22 found at EPCSs and functions there, providing a new cell-level framework for understanding  
23 MSL10 signaling. In addition, placing a mechanosensory protein at EPCS provides new insight  
24 into the function and regulation of this type of subcellular compartment.

## 25 INTRODUCTION

26  
27 Eukaryotic cells have evolved multiple mechanisms to coordinate responses between cellular  
28 compartments (Schrader et al., 2015; Mielecki et al., 2020; Sampaio et al., 2022). One such  
29 mechanism is the formation of membrane contact sites—subcellular locations where  
30 membranes of two organelles are held in close proximity by tethering proteins—which serve as  
31 sites of exchange, signaling, and organization in all eukaryotic cells (Scorrano et al., 2019; Prinz  
32 et al., 2020). One type of membrane contact site is the endoplasmic reticulum (ER)-plasma  
33 membrane (PM) contact site (EPCSs). Mammalian EPCSs are important sites for the  
34 metabolism and transport of phospholipids and allow for the coordination of ion fluxes (Zaman  
35 et al., 2020; Li et al., 2021). In plants, EPCSs help maintain phospholipid homeostasis and cell  
36 integrity (Schapire et al., 2008; Ruiz-Lopez et al., 2021), are hubs of endocytosis (Stefano et al.,  
37 2018) and autophagy (Wang et al., 2019), and regulate cell-cell transport at plasmodesmata  
38 (Levy et al., 2015; Ishikawa et al., 2020).

39  
40 Several components of plant EPCSs are conserved across eukaryotes. The integral ER proteins  
41 synaptotagmins (SYTs) and vesicle-associated membrane protein (VAMP)-associated protein  
42 (VAP)27s are homologous to tricalbins and Scs2/Scs22, respectively, in yeast, and to extended-  
43 synaptotagmins and VAPs, respectively, in mammals. In yeast, tricalbins and Scs2 and Scs22  
44 additively contribute to tethering the ER and PM to each other (Manford et al., 2012), and it is  
45 likely that plant SYTs and VAP27s also have a cooperative tethering function. Plant VAP27s  
46 may serve as a scaffold, as they are known to interact with a variety of proteins, and link EPCSs  
47 to endocytic (Stefano et al., 2018) and autophagic (Wang et al., 2019) machinery as well as to  
48 the actin cytoskeleton (Wang et al., 2014). Plant SYTs are required to maintain plasma  
49 membrane integrity in the face of stressors (Schapire et al., 2008; Yamazaki et al., 2008; Perez-  
50 Sancho et al., 2015; Ruiz-Lopez et al., 2021), probably by transporting lipids like their yeast and  
51 mammalian homologs (Saheki et al., 2016; Qian et al., 2021). Furthermore, *Arabidopsis thaliana*  
52 SYT1 changes localization and is required for cell integrity in response to mechanical pressure  
53 (Perez-Sancho et al., 2015), implicating EPCSs in the perception of mechanical stimuli.  
54 However, how mechanical information might be transmitted to or from EPCSs is completely  
55 unknown.

56  
57 Organisms have evolved a variety of strategies to sense and respond to mechanical stimuli.  
58 One kind of mechanosensory protein—the mechanosensitive (MS) ion channel—represents a

59 particularly ancient strategy that most cells still use (Árnadóttir and Chalfie, 2010; Booth et al.,  
60 2015). Most MS ion channels open and conduct ions in response to lateral membrane tension,  
61 transducing mechanical stimuli like touch, vibration, swelling, or shearing into an  
62 electrochemical signal (Kefauver et al., 2020). There is some understanding of the stimuli that  
63 activate particular plant MS channels (cell swelling, cell shrinking, encountering a barrier) as  
64 well as the adaptive processes in which they participate (relieving cell swelling, enhancing  
65 salinity tolerance, root penetration, regulating organellar morphology) (Codjoe et al., 2021).  
66 What is less understood is how signals from MS channels are coordinated across cell  
67 compartments and transduced to trigger longer-term, cell-level adaptations.

68  
69 Arabidopsis MscS-Like (MSL)10 is a member of a conserved family of MS channels found in  
70 plants, bacteria, archaea, and some fungi (Hamilton et al., 2015). MSL10 is a bona fide MS ion  
71 channel and its tension-sensitive channel properties are relatively well-characterized (Haswell et  
72 al., 2008; Maksaev and Haswell, 2012; Maksaev et al., 2018). MSL10 is plasma membrane-  
73 localized (Haswell et al., 2008; Velej et al., 2014), and genetic studies have implicated it in a  
74 range of physiological roles. In response to hypo-osmotic cell swelling, MSL10 promotes a  
75 cytosolic  $Ca^{2+}$  transient, the accumulation of reactive oxygen species, the induction of *TOUCH-*  
76 *INDUCIBLE* gene expression, and programmed cell death (Basu and Haswell, 2020). MSL10  
77 also contributes to systemic electrical and  $Ca^{2+}$  signaling in response to wounding (Moe-Lange  
78 et al., 2021). *MSL 10* gain-of-function alleles lead to constitutive growth retardation and ectopic  
79 cell death (Basu et al., 2020) through a pathway that requires the immune co-chaperone  
80 SGT1b/RAR1/HSP90 complex, although this is likely far downstream of MSL10 activation (Basu  
81 et al., 2021). Earlier events in signal transduction by MSL10 remain unknown.

82  
83 MSL10 has primarily been studied at the protein level or at the whole plant level, but its function  
84 at the subcellular level has not been addressed. To understand how MSL10 transduces  
85 mechanical information into whole plant phenotypes, we searched for potential signaling  
86 partners through forward genetic and proteomic screens. Here we describe these screens and  
87 show how both of these approaches, in combination with live-imaging assays, reveal that  
88 MSL10 functions at EPCSs.

89

## 90 RESULTS

91

### 92 Immunoprecipitation-mass spectrometry to identify MSL10 interactome

93 We first searched for signaling partners that physically interact with MSL10 using an unbiased  
94 proteomic approach. Microsomes were isolated from seedlings expressing *35S:MSL10-GFP*  
95 (Veley et al., 2014) and MSL10-GFP was immunoprecipitated from solubilized microsome  
96 extracts using GFP-Trap beads. Liquid chromatography-tandem mass spectrometry was  
97 performed on 4 replicate immunoprecipitations from *35S:MSL10-GFP* seedlings (Veley et al.,  
98 2014) as well as 4 mock immunoprecipitations from WT (Col-0) seedlings. In total, we identified  
99 1904 peptides that mapped to 606 protein groups (**Figure 1-supplemental dataset 1**). As  
100 shown in **Figure 1a**, 239 proteins had at least 8 peptide spectral matches. Most of the proteins  
101 identified were also pulled-down with MSL10<sup>7D</sup>-GFP, an inactive version of MSL10 wherein 7  
102 serines presumed to be phosphorylation sites were mutated to aspartate or glutamate (Veley et  
103 al., 2014; Basu et al., 2020 ; **Figure 1-figure supplement 1a**). No proteins had significantly  
104 altered abundance in the MSL10 compared to MSL10<sup>7D</sup> proteomes (**Figure 1-figure**  
105 **supplement 1b**).

106

107 Among the most enriched proteins in the MSL10-GFP pull-downs were VAP27-1, VAP27-  
108 3/PVA12, and SYT1/SYTA, all of which are components of plant EPCSs (Levy et al., 2015,  
109 Wang et al., 2014, Stefano et al., 2018). This led us to perform a meta-analysis comparing the  
110 proteins that co-immunoprecipitated with MSL10 or MSL10<sup>7D</sup> with four previously published  
111 interactomes of established EPCS components: SYT1 (Ishikawa et al., 2020), VAP-RELATED  
112 SUPPRESSOR OF TMM 1 (VST1) (Ho et al., 2016), reticulon-like proteins RTNLB3 and  
113 RTNLB6 (Kriechbaumer et al., 2015), and VAP27-1 and VAP27-3 (Stefano et al., 2018). 20% of  
114 the proteins that co-immunoprecipitated with MSL10-GFP have been detected at least one of  
115 these EPCS interactomes (**Figure 1a**, shown in red). And of the 10 proteins most enriched in  
116 the MSL10-GFP pull-downs (other than MSL10, the bait), 5 were previously known to be  
117 associated with plant EPCSs: SYT1, VAP27-1, VAP27-3, actin 8 (ACT8), and AT3G62360 (a  
118 predicted protein with a carbohydrate binding-like fold). Although no single protein was detected  
119 in all interactomes compared, MSL10 shared 23 interacting proteins with VST1, 15 with SYT1,  
120 and 14 with RTNLB3/6 (**Figure 1b**). These interactomes may only partially overlap because  
121 they are incomplete, because protein complexes at EPCSs are large and difficult to fully survey,  
122 and/or because there are different EPCS complexes in different cell types or in different

123 conditions. Nevertheless, these results indicated that MSL10 physically associates with protein  
 124 complexes at EPCSs.

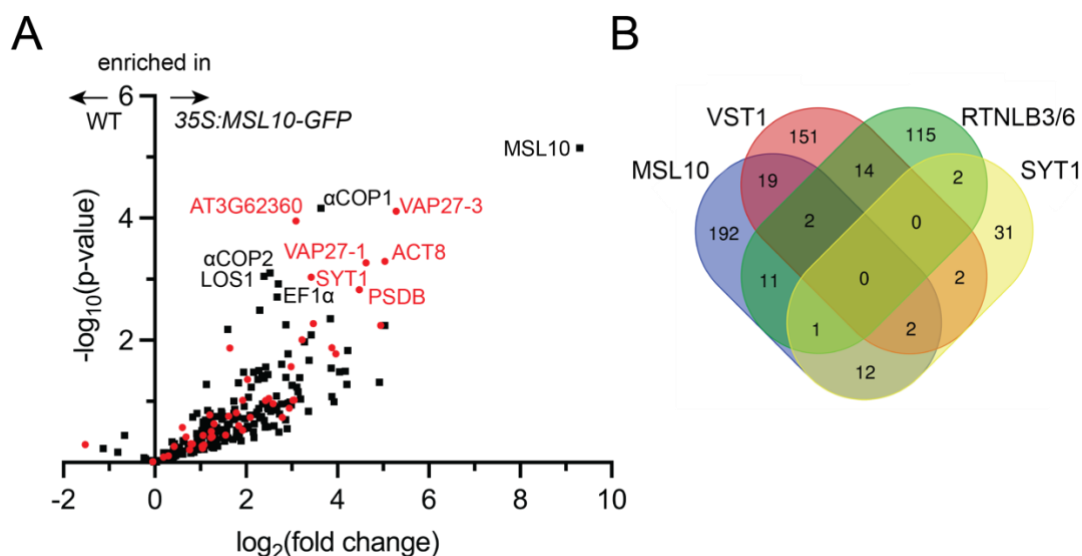

125  
 126 **Figure 1. Co-immunoprecipitation-mass spectrometry identifies MSL10-GFP interactome, which**  
 127 **shares similarities to previous EPCS interactomes. (A)** Volcano plot showing the abundance of  
 128 proteins detected in immunoprecipitations of MSL10-GFP in *35S:MSL10-GFP* seedlings (right) compared  
 129 to those identified in mock immunoprecipitations using WT Col-0 seedlings (left). Proteins were identified  
 130 by LC-MS/MS and the average abundance of each was quantified from the MS1 precursor ion intensities,  
 131 and only those proteins with at least 8 peptide spectral matches are shown. Each protein is plotted based  
 132 on its  $-\log_{10}(\text{p-value})$  of significance based on 4 biological replicates relative to its  $\log_2(\text{fold change})$  of  
 133 abundance (*35S:MSL10-GFP/WT*). Proteins also detected in immunoprecipitations of EPCS proteins  
 134 SYT1 (Ishikawa et al., 2020), RTNLB3/6 (Kriechbaumer et al., 2015), VST1 (Ho et al., 2016), and VAP27-  
 135 1/3 (Stefano et al., 2018) are indicated in red circles; proteins unique to the MSL10 interactome are  
 136 represented as black squares. The 11 most significantly enriched proteins are labelled ( $\text{p-value} < 0.002$ ).  
 137 **(B)** The overlap of the indicated interactomes with that of MSL10.

138  
 139 **MSL10 directly interacts with and co-localizes with VAP27-1 and VAP27-3**

140 We next asked if MSL10 directly interacts with a subset of its proteome. We selected 14 of the  
 141 38 most highly enriched proteins from MSL10-GFP and/or MSL10<sup>7D</sup>-GFP pulldowns (fold  
 142 change > 4 and p-value < 0.05), including the 5 previously associated with EPCSs for further  
 143 testing. We first employed the yeast mating-based split-ubiquitin system (mbSUS) (Obrdlik et  
 144 al., 2004) (**Figure 2a**). MSL10 (the bait) and the proteins being tested (the prey) were tagged  
 145 with the C- and N-terminal halves of ubiquitin, respectively, such that each tag faced the cytosol.  
 146 As previously reported, MSL10-Cub was able to interact with MSL10-NubG but did not interact  
 147 with the potassium channel KAT1-NubG or untagged NubG (Basu et al., 2020). Of the 14 tested

148 yeast strains, only those expressing NubG-VAP27-1 and NubG-VAP27-3 survived on minimal  
149 media when mated to yeast expressing MSL10-Cub. Consistent with our proteomic results  
150 (**Figure 1-figure 1 supplement 1b**), the interaction between MSL10 and VAP27s in the split-  
151 ubiquitin assay was not appreciably altered in MSL10 phosphovariants (**Figure 2-figure  
152 supplement 1a**), suggesting that the activation of MSL10 signaling does not alter its ability to  
153 interact with VAP27-1 and VAP27-3. Furthermore, the conserved major sperm protein domains  
154 of VAP27s were not required for interaction with MSL10 (**Figure 2-figure supplement 1b**).  
155 Along with the lack of known VAP27-binding motifs (James and Kehlenbach, 2021) in MSL10,  
156 these results indicate that MSL10 interacts with VAP27-1 and VAP27-3 in a non-canonical way.

157  
158 We employed Förster resonance energy transfer (FRET)- fluorescence lifetime imaging  
159 microscopy (FLIM) to provide additional evidence that MSL10 directly interacts with VAP27-1  
160 and VAP27-3 in plant cells. In FRET-FLIM, when proteins are close enough for energy transfer  
161 (<10 nm), the fluorescence lifetime of the FRET donor decreases (Sun et al., 2012). MSL10-  
162 GFP transiently expressed in tobacco leaves had a fluorescence lifetime of  $2.3 \pm 0.1$  ns (**Figure  
163 2b-c**). When co-expressed with mRFP-VAP27-1 or mRFP-VAP27-3, MSL10-GFP lifetimes were  
164  $1.8 \pm 0.2$  ns (a 22% decrease) and  $1.6 \pm 0.3$  ns (a 30% decrease), respectively. Co-expressing  
165 MSL10-GFP with free mRFP did not alter the fluorescence lifetime of GFP. These fluorescence  
166 lifetimes with and without acceptors are in the same range as those previously reported for  
167 protein-protein interactions expressed in tobacco (Wang et al., 2014, 2019).

168  
169 Finally, we asked whether VAP27s and MSL10 co-localized in leaf cells of stable transgenic  
170 *Arabidopsis thaliana* lines expressing *MSL10-GFP* and *mRFP-VAP27-3* under the control of  
171 their respective promoters. We examined localization in leaf epidermal cells, where EPCSs are  
172 commonly studied and *MSL10* and *VAP27-3* are expressed (eFP Browser (Winter et al., 2007)).  
173 As expected, MSL10-GFP displayed a punctate localization at the periphery of leaf epidermal  
174 cells (**Figure 2d**) (Veley et al., 2014; Maksaev et al., 2018). In four independent  
175 *MSL10p:MSL10-GFP + mRFP-VAP27-3g* lines, mRFP signal was punctate at the cell periphery  
176 and partially co-localized with GFP signal. On average, across the four lines,  $33 \pm 4\%$  of  
177 MSL10-GFP signal co-localized with VAP27-3-mRFP, while  $32 \pm 4\%$  of mRFP-VAP27-3 co-  
178 localized with MSL10-GFP (Mander's overlap coefficient M1 and M2 respectively, **Figure 2e**).  
179

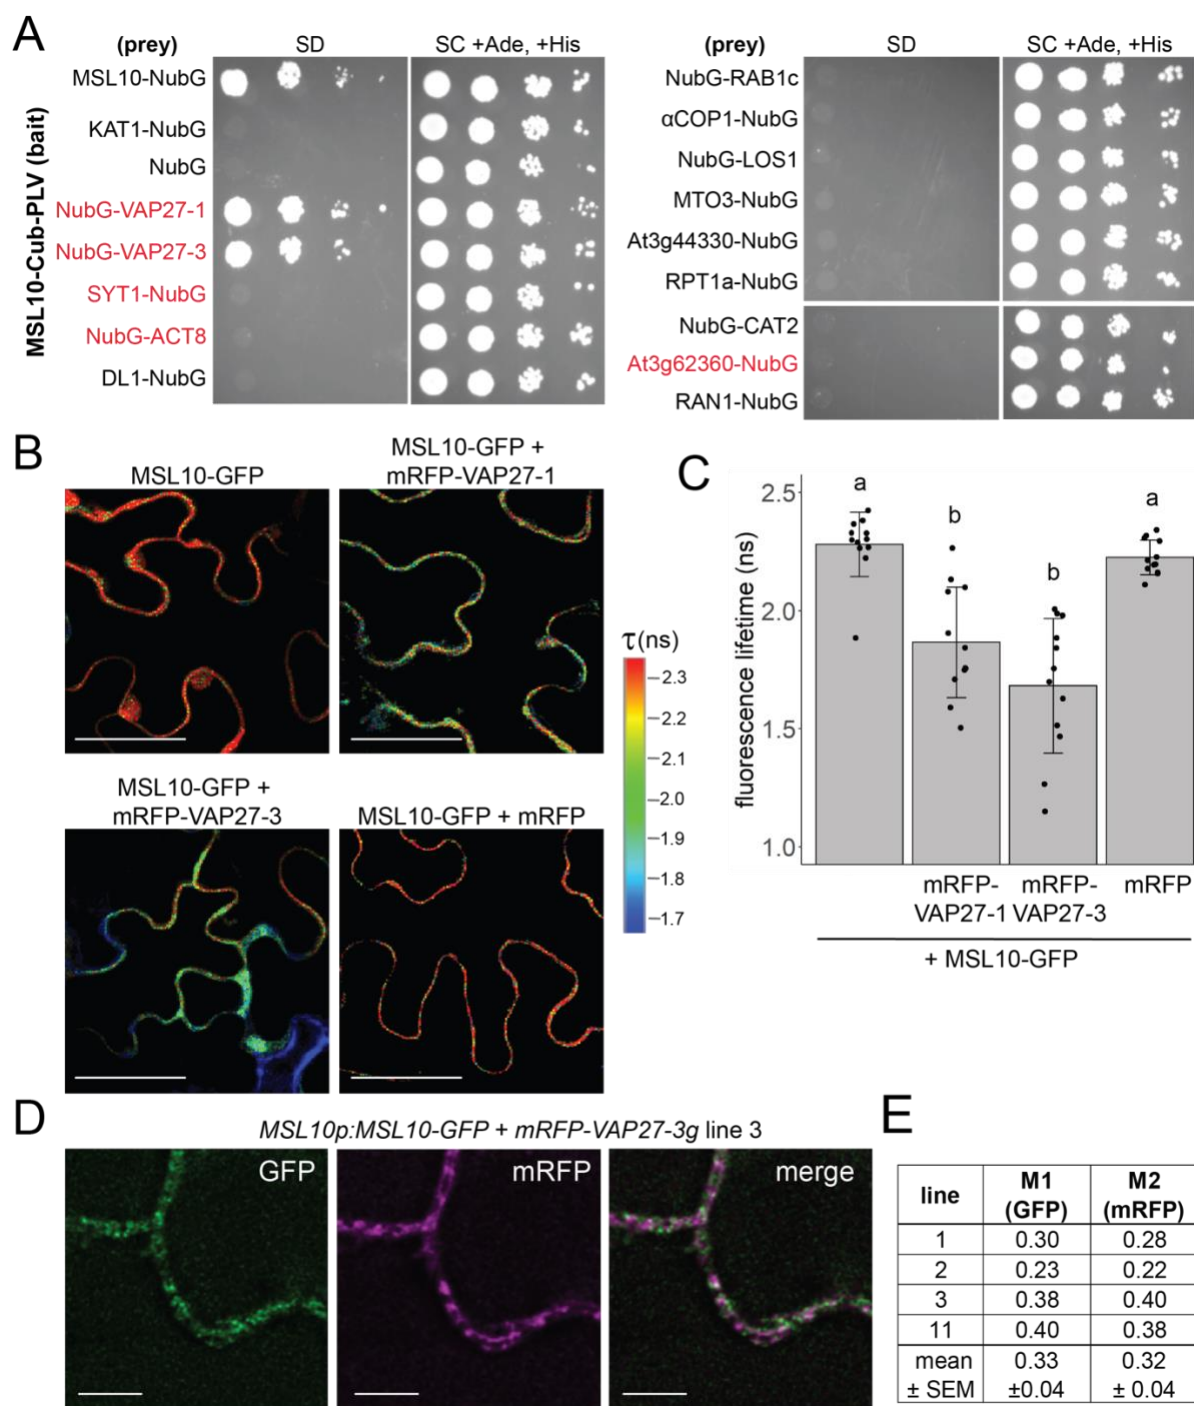

180  
 181 **Figure 2. MSL10 interacts with VAP27-1 and VAP27-3.** (A) Mating-based split-ubiquitin assay. VAMP-  
 182 associated protein 27-1 (VAP27-1), VAP27-3, synaptotagmin 1 (SYT1), actin 8 (ACT8), dynamin-like  
 183 (DL1), RAB GTPase homolog 1c (RAB1c), coatamer  $\alpha$ 1 subunit ( $\alpha$ COP1), LOW EXPRESSION OF  
 184 OSMOTICALLY RESPONSIVE GENES (LOS1), METHIONINE OVERACCULATOR 3 (MTO3),  
 185 AT3G44330, regulatory particle triple-A 1A (RPT1a), catalase 2 (CAT2), AT3G62360, and Ras-related  
 186 nuclear protein 1 (RAN1) were tested for interaction with MSL10. Proteins labelled in red were previously

187 detected at EPCSs. The results in (A) are consistent with another independent mbSUS assay using  
188 independent transformants. **(B-C)** *In vivo* FRET-FLIM on *UBQ:MSL10-GFP* and *UBQ:mRFP-VAP27-1* or  
189 *UBQ:mRFP-VAP27-3* transiently expressed in tobacco. **(B)** Representative heat maps of the fluorescence  
190 lifetime ( $\tau$ ) of GFP measured in tobacco abaxial epidermal cells 5 days post-infiltration. Scale = 50  $\mu$ m.  
191 **(C)** Average GFP fluorescence lifetime. Each data point represents the value from 1 field of view (3 fields  
192 of view per plant from 4 infiltrated plants for a total of  $n=12$  for each combination). Error bars, SD. Groups  
193 indicated by the same letter are not statistically different according to ANOVA with Tukey's post hoc test.  
194 **(D)** Deconvolved confocal laser scanning micrographs of leaf abaxial epidermal cells from stable  
195 Arabidopsis T1 lines co-expressing MSL10-GFP and mRFP-VAP27-3 driven by their endogenous  
196 promoters. Scale = 5  $\mu$ m. **(E)** Mander's overlap coefficients M1 and M2 calculated from images taken  
197 from 4 independent T1 lines.

198

199 Taken together, the data shown in Figures 1 and 2 indicate that MSL10 interacts directly with  
200 two VAP27s and indirectly with several other components of EPCSs. Because VAP27-1 and  
201 VAP27-3 are integral ER proteins (Saravanan et al., 2009; Wang et al., 2014) and MSL10 is  
202 found in the plasma membrane (Haswell et al., 2008; Veley et al., 2014), an interaction between  
203 the two would, by definition, create an EPCS.

204

### 205 **MSL10 alters EPCS morphology by expanding SYT1 puncta**

206 Given that EPCS patterning is stress-responsive (Pérez-Sancho et al., 2015; Lee et al., 2019,  
207 2020; Ruiz-Lopez et al., 2021), we hypothesized that MSL10 might serve a regulatory function  
208 at EPCSs. We began to test this hypothesis by investigating the effect of MSL10 mutant alleles  
209 on the localization of a general EPCS marker, Membrane-Attached PeriPhERal (MAPPER)-  
210 GFP (Chang et al., 2013). We crossed a *UBQ:MAPPER-GFP* line (Lee et al., 2019) to loss-of-  
211 function (*msl10-1*, (Haswell et al., 2008)) and gain-of-function (*msl10-3G*, (Zou et al., 2016;  
212 Basu et al., 2020)) *MSL10* mutant lines. In the F3 generation, we compared MAPPER-GFP  
213 localization in WT, *msl10-1* or *msl10-3G* backgrounds. MAPPER-GFP puncta looked similar in  
214 segregated WT and *msl10-1* plants (**Figure 3a-b**). In contrast, MAPPER-GFP puncta were  
215 expanded in adult *msl10-3G* plants (**Figure 3a,c**), taking up a larger proportion ( $13.1 \pm 3.1\%$ ) of  
216 the cellular area in adult *msl10-3G* leaf epidermal cells compared to those in plants with the WT  
217 *MSL10* allele ( $8.7 \pm 2.9\%$ ).

218

219 We next examined VAP27 and SYT1 localization. We generated lines stably expressing VAP27-  
220 1-GFP, VAP27-3-GFP, and SYT1-GFP under control of the *UBQ10* promoter and crossed them  
221 to *msl10-1* and *msl10-3G* plants. The genotypes of surviving F2 seedlings from some of these



222 crosses indicated genetic interactions between *MSL10* and the overexpression transgenes  
223 (**Figure 3-supplementary table 1**). For example, we were unable to isolate plants carrying the  
224 *UBQ:VAP27-3-GFP* transgene in either the *msl10-1* or *msl10-3G* backgrounds when grown on  
225 soil, and fewer *msl10-1*; *UBQ:SYT1-GFP* plants were isolated than would be predicted by  
226 normal Mendelian segregation (**Figure 3-supplementary table 1**).

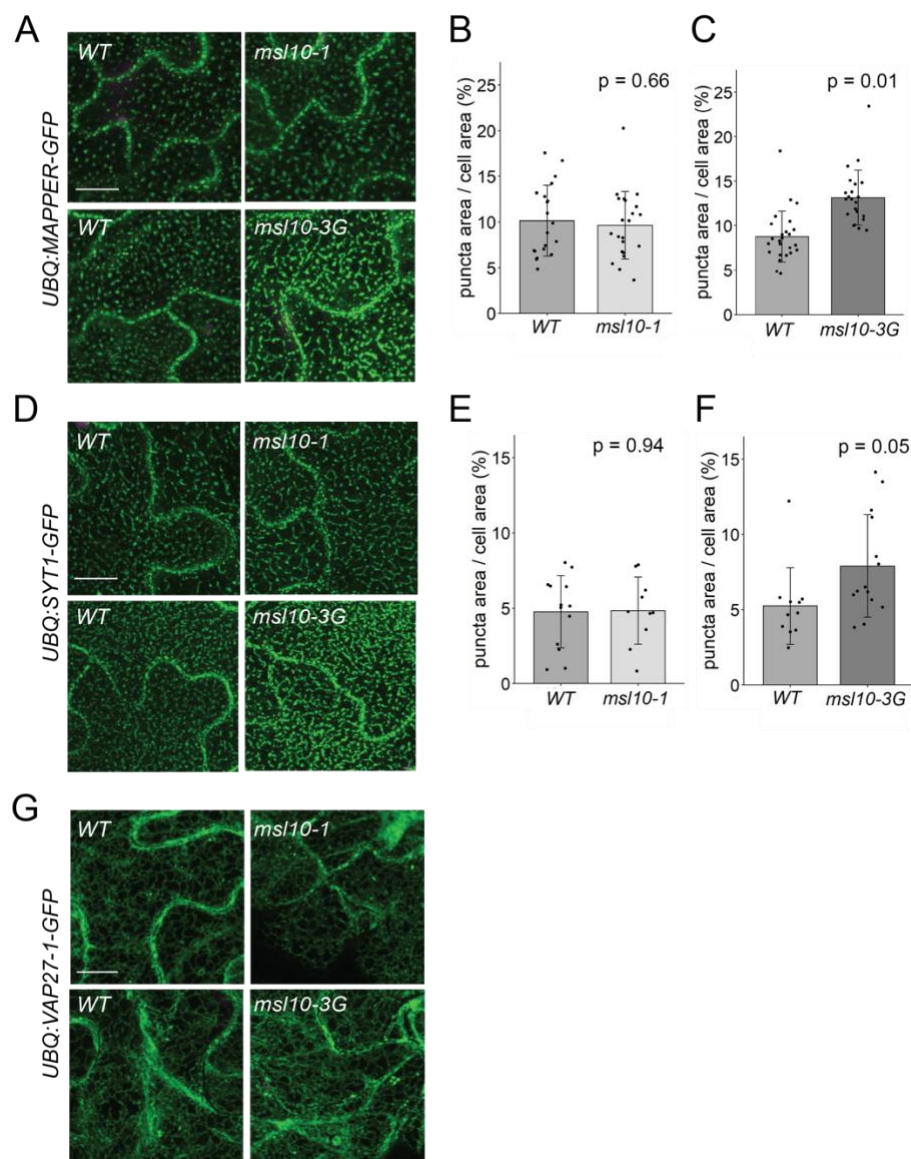

227  
228 **Figure 3. Some EPCSs are expanded in *msl10-3G* plants.** Confocal maximum intensity Z-projections  
229 of GFP-tagged proteins in the indicated *MSL10* backgrounds. MAPPER-GFP (**A**), SYT1-GFP (**D**), and  
230 VAP27-1-GFP (**G**) in 4-week-old abaxial leaf epidermal cells. Plants shown here are cousins (**A-D**) or  
231 siblings (**G**). Green, GFP; magenta, chlorophyll autofluorescence. Scale = 10 μm. Quantification of the  
232 percentage of the leaf epidermal cell volume taken up by MAPPER-GFP (**B-C**) or SYT1-GFP (**E-F**)  
233 puncta in plants in the *msl10-1* or *msl10-3G* background compared to WT cousins. Each data point

234 represents the mean value of 20-50 epidermal cells from one plant, n= 10-25 plants per genotype. Error  
235 bars, SD. Means were compared by Student's t-tests when data was normally distributed (**B,E**) or Mann-  
236 Whitney U tests when it was not (**C,F**).

237  
238 VAP27-1-GFP is localized to the ER in Arabidopsis leaf epidermal cells, forming some puncta  
239 (although fewer than reported for VAP27-1 when transiently overexpressed in tobacco (Wang et  
240 al., 2014, 2016)). We found that the VAP27-1 localization pattern was similar in *msl10-1*, *msl10-*  
241 *3G*, and their segregated WT *MSL10* backgrounds (**Figure 3g**). As there were so few VAP27-1-  
242 GFP puncta, we did not quantify their area as for MAPPER-GFP. SYT1-GFP displayed the  
243 expected punctate localization (Levy et al., 2015; Pérez-Sancho et al., 2015). Due to the  
244 presumed synthetic lethality described above, we were unable to assess the effect of MSL10 on  
245 VAP27-3 EPCSs, and SYT1-GFP localization was unchanged in the *msl10-1* background  
246 (**Figure 3d-e**). However, in the *msl10-3G* background, SYT1-GFP puncta were expanded in leaf  
247 epidermal cells compared to the WT, leading to a modest, but significant increase in SYT1-GFP  
248 area relative to cellular area (**Figure 3d,f**). This SYT1-GFP pattern closely resembled that  
249 observed with the MAPPER-GFP marker (compare **Figure 3a** and **3d**).

250  
251 **MSL10 does not contribute to EPCS rearrangement in response to osmotic perturbations**  
252 SYT-EPCSs are sensitive to environmental conditions, quickly changing localization in response  
253 to mechanical pressure (Pérez-Sancho et al., 2015) and slowly remodeling in response to  
254 freezing and salinity stress and the presence of rare ions (Lee et al., 2019, 2020; Ruiz-Lopez et  
255 al., 2021). We tested if MSL10 was required for some of these EPCS rearrangements. As  
256 previously reported (Lee et al., 2019), EPCSs marked by MAPPER-GFP in cotyledon epidermal  
257 cells expanded after a 16 hr exposure to 100 mM NaCl (**Figure 3-figure supplement 1a**). A  
258 similar MAPPER-GFP localization pattern was also observed in *msl10-1* and *msl10-3G*  
259 seedlings treated with NaCl, indicating that MSL10 does not influence the expansion of EPCSs  
260 during salinity stress. Salinity-induced EPCS expansion is reversible when seedlings are moved  
261 to media lacking NaCl, triggering a hypo-osmotic shock (Lee et al., 2019). As MSL10 plays a  
262 role in the cellular response to hypo-osmotic cell swelling (Basu and Haswell, 2020), we asked if  
263 MSL10 was also responsible for EPCS shrinking under these conditions. We found that  
264 MAPPER-GFP signal decreased in cotyledon epidermal cells 24 hr after hypo-osmotic shock  
265 (**Figure 3-figure supplement 1b**) but that this phenomenon was unaffected by the *msl10-1* or  
266 *msl10-3G* alleles. SYT1-GFP has been reported to move from a 'beads on a string' localization  
267 pattern to a punctate one when mechanical stress is applied (Pérez-Sancho et al., 2015). In our

268 hands, SYT1-GFP localization always appeared punctate in cotyledon epidermal cells, and we  
269 did not see an appreciable change in this localization when pressure was added (**Figure 3-**  
270 **figure supplement 1c**).

271

### 272 **A forward genetic screen provides evidence for functional interactions between *MSL10*** 273 **and *SYT5* and *SYT7***

274 Above, we describe physical interactions between *MSL10* and the EPCS components VAP27-1  
275 and VAP27-3, and a functional interaction wherein SYT1 EPCSs are expanded in *msl10-3G*  
276 plants. Further evidence for functional interactions between *MSL10* and EPCS components  
277 came from a genetic screen that was performed at the same time as the above experiments.  
278 We used the obvious growth defect of *msl10-3G* plants (Zou et al., 2016; Basu et al., 2020) as  
279 the basis of a visual screen, as illustrated in **Figure 4a**. EMS-induced suppressor mutants,  
280 referred to as *suppressed death from msl10-3G* (*sdm*), were initially isolated based on  
281 increased height compared to parental *msl10-3G* plants in the M1 and M2 generations. As  
282 *msl10-3G* plants share some of the characteristics of lesion-mimicking-mutants (Basu et al.,  
283 2021), and intragenic mutations are particularly common in suppressor screens of lesion-  
284 mimicking mutants (van Wersch et al., 2016), we sequenced *MSL10* exons in all 40 mutant  
285 lines. Indeed, 35 had a missense mutation in the *MSL10* coding or splice-junction sequences  
286 (**Figure 4-figure supplement 1a**). The five remaining *sdm* mutants were presumed to have  
287 extragenic suppressor mutations. The mapping-by-sequencing strategy we employed (see  
288 below) successfully identified extragenic suppressor mutations for two of these five, *sdm26* and  
289 *sdm34*.

290

291 Notably, *sdm26* and *sdm34* mutant plants were taller than *msl10-3G* plants but not as tall as WT  
292 plants (**Figure 4b**). The offspring of both *sdm26* and *sdm34* backcrosses to *msl10-3G* (BC<sub>1</sub>F<sub>1</sub>  
293 plants) were as tall as their *sdm* parents (**Figure 4b**). Furthermore, in the BC<sub>1</sub>F<sub>2</sub> generation,  
294 plants with intermediate height (*sdm* phenotype) were present approximately 3:1 relative to  
295 those with the *msl10-3G* dwarf phenotype (**Figure 4c**), indicating that the *sdm* mutations are  
296 dominant in the *msl10-3G* background, at least for this phenotype. When *sdm26* and *sdm34*  
297 plants were outcrossed to the *msl10-1* null allele, plants with the parental *msl10-3G* phenotype  
298 were recovered in the F<sub>2</sub> generation (**Figure 4-figure supplement 1b**), confirming that the  
299 *sdm26* and *sdm34* lesions are extragenic alleles unlinked to *MSL10*. Another characteristic  
300 phenotype of *msl10-3G* plants, ectopic cell death, was also suppressed in *sdm26* and *sdm34*

301 leaves compared to those of parental and segregating *msl10-3G* siblings, although the *sdm*  
 302 mutants exhibited slightly more cell death than WT plants (**Figure 4d**).

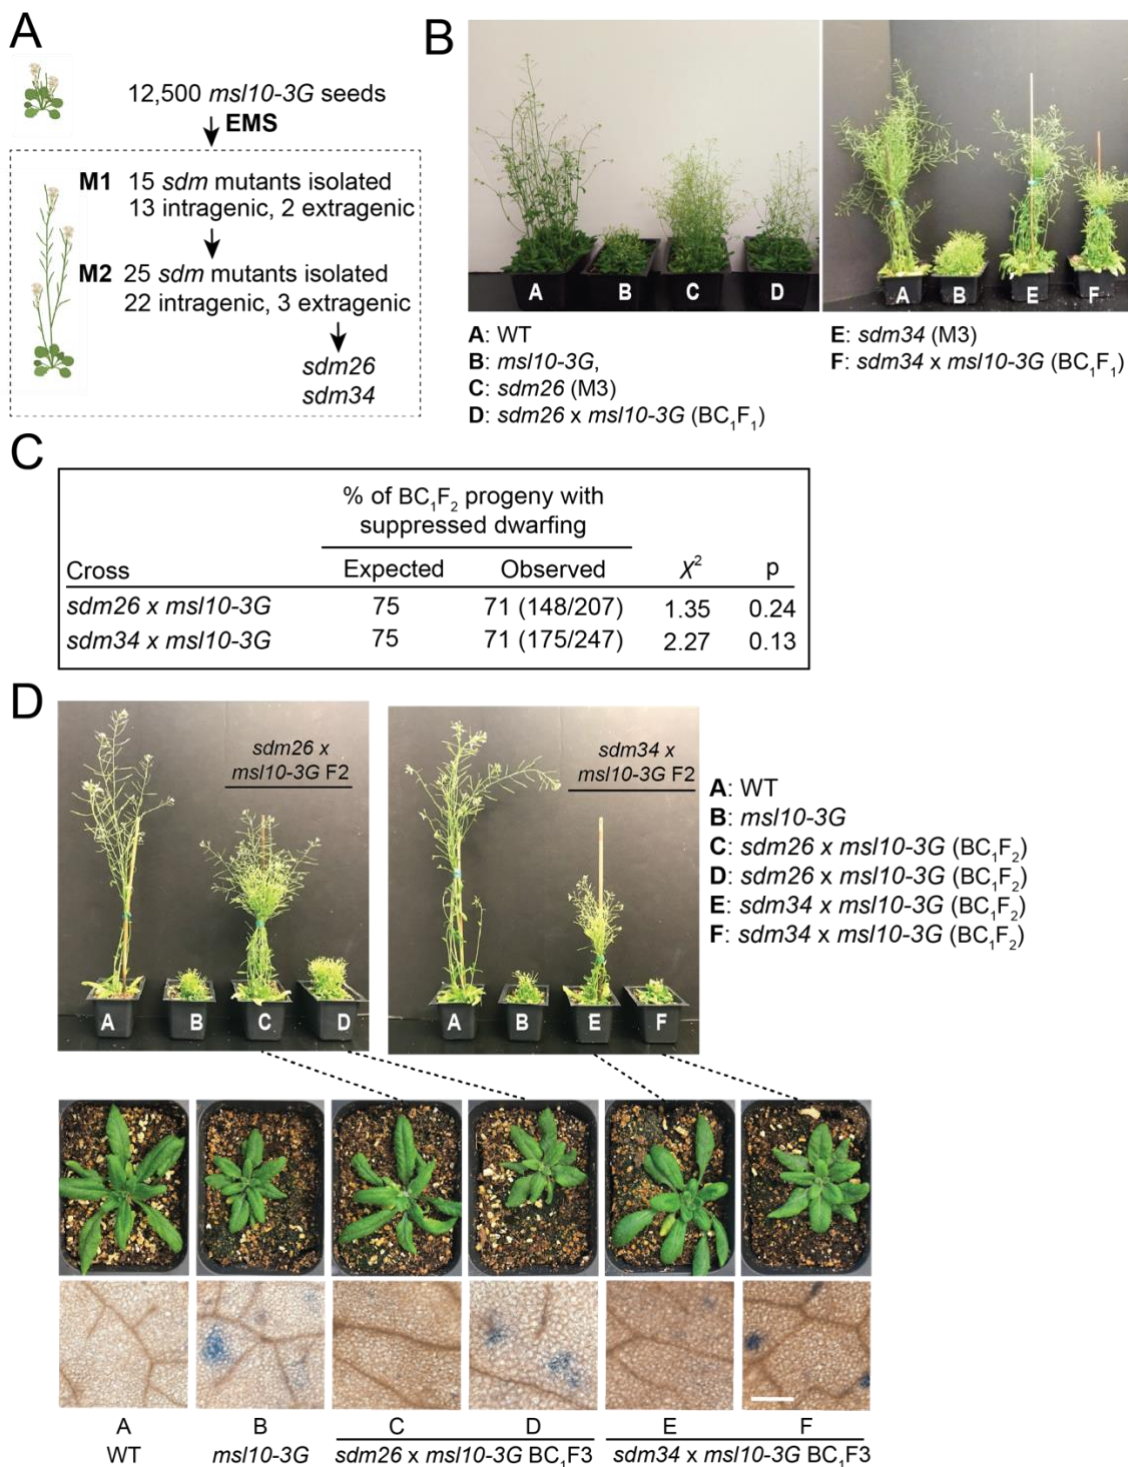

303  
 304 **Figure 4. A forward genetic screen identifies *sdm26* and *sdm34*, dominant suppressors of *msl10-***  
 305 **3G height and ectopic cell death phenotypes, *sdm26* and *sdm34*.** (A) Schematic of the screen. (B)  
 306 Images of the indicated plants after 4-5 weeks of growth. (C) Segregation of height phenotypes in the

307 BC<sub>1</sub>F<sub>2</sub> generation, compared to the expected segregation ratio assuming the *sdm* alleles were dominant.  
308 **(D)** Siblings of backcrossed *sdm26* and *sdm34* mutants were isolated that were fixed for the *sdm*  
309 (suppressed dwarfing) or *msl10-3G* (dwarf) phenotypes. Top: 5-week-old BC<sub>1</sub>F<sub>2</sub> plants of the indicated  
310 genotypes. Middle: 4-week-old BC<sub>1</sub>F<sub>3</sub> progeny of plants at the top, as indicated with dashed lines.  
311 Bottom: Leaves of 4-week-old BC<sub>1</sub>F<sub>3</sub> plants stained with Trypan blue to assess cell death. These results  
312 are representative of at least five other plants for each genotype. Scale = 300 μm.

313  
314 We employed a whole genome sequencing strategy to identify the mutations responsible for  
315 *sdm26* and *sdm34* phenotypes (**Figure 5a**). BC<sub>1</sub>F<sub>2</sub> plants were separated by phenotype into  
316 pools of 50 plants each, and genomic DNA was extracted from pooled tissue and sequenced at  
317 80x coverage. As *sdm26* and *sdm34* are dominant suppressor mutations, we searched for  
318 EMS-induced SNPs that 1) had an allele frequency of 0.66 in the pool of plants with the *sdm*  
319 phenotype and 2) were absent in the *msl10-3G* phenotype pool. Intervals of adjacent SNPs with  
320 such allele frequencies were found on chromosome 1 for *sdm26* and chromosome 3 for *sdm34*  
321 (**Figure 5-figure supplement 1**). We failed to identify clear intervals of linked SNPs with the  
322 expected allele frequencies for the other 3 presumed extragenic mutants.

323  
324 The intervals in *sdm26* and *sdm34* contained 8 and 13 genes, respectively. The *sdm26* genome  
325 encoded a missense mutation (Ser66→Phe) in the *synaptotagmin 5* (*SYT5*) gene and the  
326 *sdm34* genome encoded a Gly427→Arg substitution in *synaptotagmin 7* (*SYT7*, *CBL1*,  
327 *NTMC2T4*; **Figure 5b**). *SYT5* and *SYT7* are known to interact with each other and with *SYT1* at  
328 EPCSs (Ishikawa et al., 2020; Lee et al., 2020). Given these results, and that *MSL10* interacts  
329 with EPCS proteins (**Figure 1, 2**), the SNPs in *SYT5* and *SYT7* were promising candidates for  
330 causing the suppression of the *msl10-3G* phenotypes in *sdm26* and *sdm34*. However, it  
331 remained possible that lesions elsewhere in these intervals were instead responsible.

332  
333 We therefore attempted to recreate the *sdm* phenotypes by expressing *SYT5 S66F* and *SYT7*  
334 *G427R* from transgenes in unmutagenized *msl10-3G* plants. We expected to see *sdm*-like  
335 phenotypes in the T<sub>1</sub> generation because the suppressor mutations in *sdm26* and *sdm34* plants  
336 were dominant. As anticipated, *msl10-3G+SYT5g S66F* and *msl10-3+SYT7g G427R* T<sub>1</sub> plants  
337 were taller than untransformed *msl10-3G* plants (**Figure 5d**). The amount of ectopic cell death  
338 was also suppressed compared to *msl10-3G* leaves. WT *SYT5g-mRFP* or WT *SYT7g-mRFP*  
339 had no discernable effect on plant height or ectopic cell death in T<sub>1</sub> plants in the *msl10-3G*  
340 background. These results provide strong evidence that *SYT5 S66F* and *SYT7 G427R*

341 mutations caused suppression of *msl10-3G* phenotypes in the *sdm26* and *sdm34* mutants,  
 342 respectively.

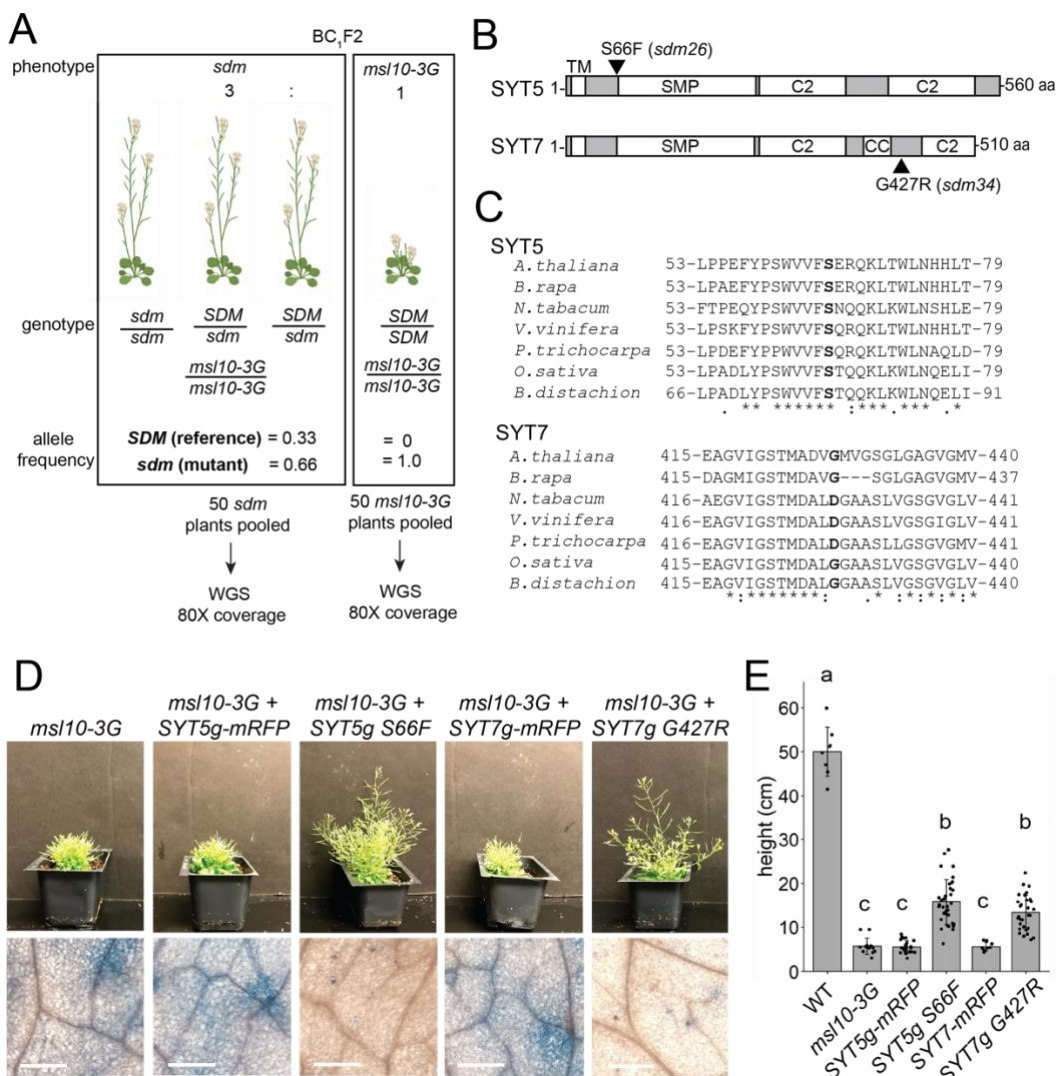

343  
 344 **Figure 5. SYT5 S66F and SYT7 G427R are the causal mutations in *sdm26* and *sdm34*, respectively.**  
 345 **(A)** Overview of backcrossing and mapping-by-sequencing of *sdm* mutants. **(B)** Location of *sdm26* and  
 346 *sdm34* missense mutations in the SYT5 and SYT7 proteins, respectively. UniProt was used to predict  
 347 protein domains and their location. TM, transmembrane; SMP, synaptogamin-like mitochondrial-lipid-  
 348 binding protein domain; CC, coiled coil; C2, Ca<sup>2+</sup> binding. **(C)** Conservation of Ser66 and Gly427 residues  
 349 in SYT5 and SYT7 homologs, respectively, in the predicted proteomes of selected seed plants. **(D-E)**  
 350 Phenotypes of *msl10-3G* plants expressing WT or *sdm* mutant SYT5 and SYT7 transgenes. **(D)** Top:  
 351 Images of representative T1 lines. Bottom: Trypan blue staining of a leaf from the same plants. Scale =  
 352 300 μm. **(E)** Mean and standard deviation of plant height of n= 9-32 T1 lines per construct.

353

354 To address whether the *sdm26* and *sdm34* mutations might be dominant negative, we crossed  
355 *msl10-3G* plants to null *syt5* and *syt7* alleles (Ishikawa et al., 2020). Double *syt5*; *msl10-3G* and  
356 *syt7*; *msl10-3G* mutants resembled *msl10-3G* plants (**Figure 6-supplemental figure 1a-b**). The  
357 inability of null *syt5* and *syt7* alleles to suppress *msl10-3G* phenotypes indicates that the *sdm26*  
358 (*SYT5 S66F*) and *sdm34* (*SYT7 G427R*) alleles do not cause suppression by impairing the  
359 function of WT SYT5 or SYT7. Additionally, the null *syt1-2* allele (Ishikawa et al., 2020) had no  
360 effect on *msl10-3G* growth defects or ectopic death (**Figure 6-supplemental figure 1a**).

361

### 362 ***sdm26* and *sdm34* alleles do not alter SYT5 or SYT7 localization or MSL10 levels**

363 The SYT5 S66F and SYT7 G427R point mutations occur in very different parts of the  
364 synaptotagmin proteins and are not located in any of the predicted functional domains (Ishikawa  
365 et al., 2020; Lee et al., 2020; The UniProt Consortium, 2021) (**Figure 5b**). However, S66 is fully  
366 conserved in SYT5 homologs from monocots and dicots and G427 is partially conserved in  
367 SYT7 homologs from Brassicaceae and monocots (**Figure 5c**), and thus may be important for  
368 structure or function. We first investigated if the *sdm* point mutations change the localization of  
369 SYT5 and SYT7. When transiently expressed in tobacco, SYT5 S66F-mRFP and SYT7 G427R-  
370 mRFP had similar localization and dynamics to their WT counterparts, localizing to dynamic ER  
371 tubules and to puncta that persisted over time, as previously reported (Ishikawa et al., 2020;  
372 Lee et al., 2020) (**Figure 6-supplemental figure 1c; Movies 1-4**). Additionally, the *sdm* point  
373 mutations do not alter SYT5 or SYT7 transcript stability (**Figure 6-supplemental figure 1d**). To  
374 rule out a trivial explanation for the suppression of *msl10-3G* phenotypes—that the *sdm26* and  
375 *sdm34* alleles decrease MSL10 expression and/or stability—we examined expression of  
376 *MSL10p:MSL10-GFP* expression in those backgrounds. We found equivalent MSL10-GFP  
377 fluorescence and protein levels in *sdm26* plants and their WT siblings, and in *sdm34* plants  
378 compared to their WT siblings (**Figure 6-supplemental figure 1e-f**). In summary, the *sdm26*  
379 and *sdm34* alleles do not affect MSL10 expression or protein stability, nor SYT5 or SYT7  
380 localization, suggesting that they suppress MSL10 signaling in some other way.

381

### 382 **EPCS expansion is not suppressed in *sdm26* and *sdm34* mutants**

383 Given that SYT1-EPCSs were expanded in *msl10-3G* mutants, we wondered if increased  
384 connections between the ER and PM in *msl10-3G* plants might be responsible for the growth  
385 retardation and ectopic cell death associated with this allele. If this were the case, the enhanced  
386 EPCS area observed in *msl10-3G* plants would be suppressed by *sdm26* or *sdm34* alleles. To  
387 test this idea, we crossed *UBQ:MAPPER-GFP* plants to the *sdm26* mutant. To our surprise, the

388 larger EPCS area in *msl10-3G* plants ( $13.7\pm 4.2\%$ ) was not suppressed in *sdm26* leaf epidermal  
 389 cells ( $13.5\pm 3.7\%$ ) (**Figure 6a-b**). The same observation was made in plants derived from a  
 390 *UBQ:MAPPER-GFP x sdm34* cross (**Figure 6c-d**). Thus, differences in ER-PM connectivity, at  
 391 least as marked by MAPPER-GFP, do not drive the phenotypic differences we observe between  
 392 WT, *msl10-3G*, and *sdm* plants.

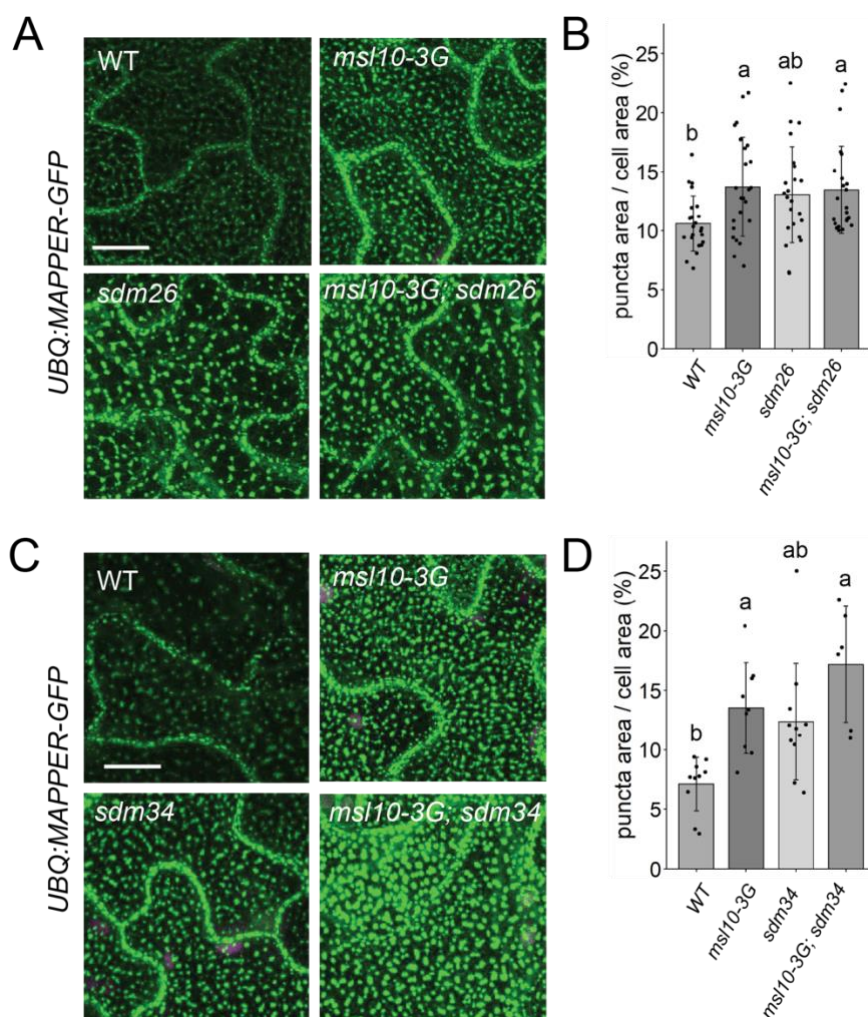

393  
 394 **Figure 6. *sdm26* and *sdm34* alleles do not suppress expanded EPCSs in *msl10-3G* leaves. (A,C)**  
 395 Confocal maximum intensity Z-projections of MAPPER-GFP fluorescence in 4-week-old abaxial leaf  
 396 epidermal cells of the indicated genotypes. Scale= 10 μm. **(B,D)** Quantification of the percentage of the  
 397 leaf epidermal cell volume taken up by MAPPER-GFP puncta in plants of the indicated genotypes. Each  
 398 data point represents the mean value of 20-50 epidermal cells from one plant, n = 6-23 plants per  
 399 genotype. Error bars, SD. Groups indicated with the same letters are not significantly different as  
 400 assessed by Kruskal-Wallis with Dunn's post hoc test when measurements were not normally distributed  
 401 **(B)** or ANOVA with Scheffe's post hoc test when they were **(D)**.

402



403 **MSL10 does not interact with SYT5 or SYT7 or influence their localization**

404 As SYT1-EPCSs were expanded in *msl10-3G* leaf epidermal cells (**Figure 3d,f**), and SYT1 can  
 405 interact with SYT5 and SYT7 (Ishikawa et al., 2020; Lee et al., 2020), we asked if SYT5 and  
 406 SYT7 localization were also altered in the *msl10-3G* background. We transformed WT Col-0  
 407 plants with GFP-tagged constructs under the control of the *UBQ10* promoter and crossed these  
 408 lines to *msl10-1* and *msl10-3G* plants. Both SYT5-GFP and SYT7-GFP had a partially punctate,  
 409 partially ER localization, as we had observed with mRFP-tagged versions expressed transiently  
 410 in tobacco (**Figure 7a-b, Figure 6-supplemental figure 1**), and this localization pattern was  
 411 unaffected by the *msl10-3G* or *msl10-1* alleles.

412

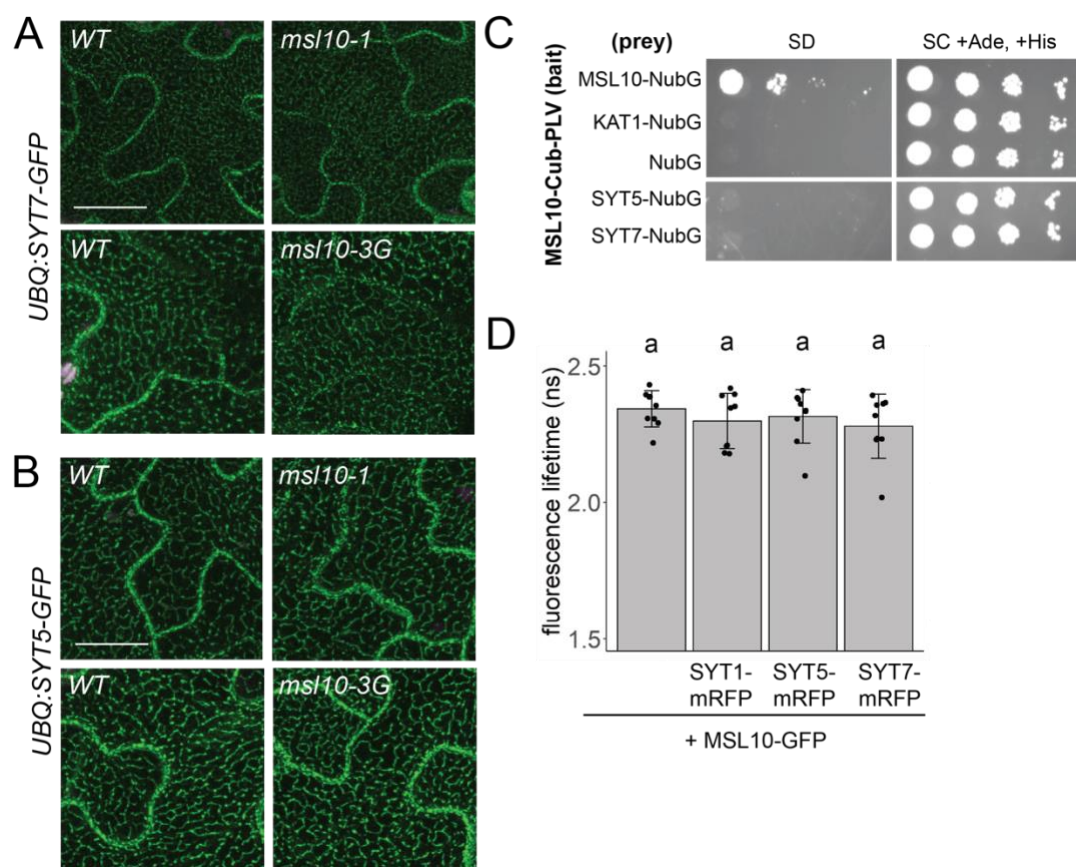

413  
 414 **Figure 7. MSL10 does not interact with SYT5 or SYT7 nor alter their localization. (A-B)** Confocal  
 415 maximum Z-intensity projections of abaxial leaf epidermal cells of 4-week-old plants with the indicated  
 416 *MSL10* alleles. Plants in **(A)** are F2 siblings, in **(B)** F3 cousins. Scale = 15  $\mu$ m. **(C)** Mating-based split-  
 417 ubiquitin assay testing the interaction of MSL10 with SYT5 and SYT7, performed as in Figure 2a. **(D)**  
 418 Fluorescence lifetime ( $\tau$ ) of GFP measured using FRET-FLIM when *UBQ:MSL10-GFP* was transiently  
 419 expressed tobacco leaves for 5 days, with or without *UBQ:SYT-mRFP* constructs. Each data point  
 420 represents the value from 1 field of view (3 fields of view per plant from 3 infiltrated plants for a total of n=

421 9 for each combination). Error bars, SD. Groups indicated by the same letter are not statistically different  
422 according to ANOVA with Tukey's post hoc test.

423

424 We next asked if MSL10 physically interacts with SYT5 or SYT7. Although SYT5 and SYT7  
425 were not detected in the MSL10 interactome (**Figure 1**), those experiments were performed in  
426 seedlings, whereas the suppression of *msl10-3G* phenotypes by *sdm26* and *sdm34* alleles was  
427 observed in adult plants. In the mbSUS assay, yeast expressing SYT5 and SYT7 did not grow  
428 on minimal media when mated to yeast expressing MSL10 (**Figure 7c**). A FRET-FLIM assay  
429 also failed to provide evidence for a direct interaction between MSL10 and SYT proteins, as co-  
430 expression of mRFP-labelled SYT5, SYT7, and SYT1 did not shift the fluorescence lifetime of  
431 MSL10-GFP (**Figure 7d**). The lack of evidence for physical interactions between MSL10 and  
432 SYT1, SYT5, and SYT7 suggests that the observed suppression of the *msl10-3G* phenotype in  
433 *sdm26* or *sdm34* mutants is executed indirectly, perhaps through signaling intermediates.

434

## 435 DISCUSSION

436

437 The mechanosensitive ion channel MSL10 has been well studied using electrophysiological  
438 approaches (Haswell et al., 2008; Maksaev and Haswell, 2012; Maksaev et al., 2018). Genetic  
439 analyses have attributed a variety of roles to MSL10, like the induction of Ca<sup>2+</sup> transients,  
440 reactive oxygen species accumulation, enhanced immune responses, and programmed cell  
441 death (Basu and Haswell, 2020; Moe-Lange et al., 2021; Basu et al., 2021), but we lack a clear  
442 understanding of how MSL10 activation leads to these downstream signaling outcomes. Studies  
443 using multiple gain-of-function *MSL10* alleles found that MSL10 signaling can trigger cell death  
444 independently of ion flux (Veley et al., 2014; Zou et al., 2016; Maksaev et al., 2018; Basu et al.,  
445 2020), though it remains unknown how this occurs. To advance our understanding of the  
446 signaling function of MSL10, we used a combination of genetic, proteomic, and cell biological  
447 approaches in an attempt to identify MSL10's signaling partners. We discovered previously  
448 unknown interactions between MSL10, which is localized to the plasma membrane, and  
449 proteins in the VAP27 and SYT families, which are integral ER membrane proteins. **Figure 8**  
450 outlines these results and provides a framework for the discussion below. We propose a model  
451 wherein 1) MSL10's direct interaction with VAP27s creates EPCSs which 2) has implications for  
452 MSL10 function and 3) SYTs and MSL10 interact indirectly to modulate MSL10 signaling and  
453 SYT1 localization.

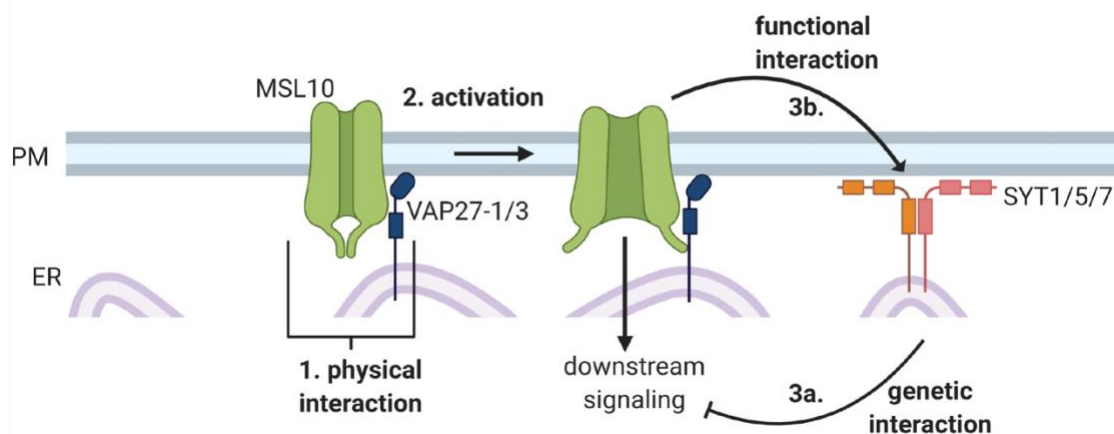

454

455 **Figure 8. Conceptual model of interactions between MSL10 and EPCS proteins.**

456

### 457 **1. MSL10 physically associates with EPCS proteins**

458 The first indication that MSL10 was part of a protein complex at EPCSs came from our search  
459 for proteins that co-immunoprecipitated with MSL10-GFP from seedling microsome extracts.

460 VAP27-1, VAP27-3, and SYT1 were among the most enriched proteins in these pulldowns  
461 **(Figure 1)**. Subsequent mbSUS and FRET-FLIM assays support a direct interaction between  
462 MSL10 and VAP27-1 and VAP27-3, but not with SYT1 or 11 other proteins tested **(Figure 2,**  
463 **Figure 3)**. SYT1, ACT8, and AT3G62360 have been detected in other EPCS proteomes  
464 (Ishikawa et al., 2020; Kriechbaumer et al., 2015), and were likely found in the MSL10  
465 interactome because of their proximity to VAP27-1 and VAP27-3. Plant EPCSs typically contain  
466 either SYT1 or VAP27-1, but SYT1- and VAP27-1-EPCSs are often found adjacent to each  
467 other (Siao et al., 2016), suggesting a physical link between two types of EPCSs.

468

## 469 **2. Implications of the VAP27-1/3 interaction for MSL10 cell death signaling**

470 The only components of our proteome (among 14 tested proteins) that interacted directly with  
471 MSL10 were VAP27-1 and VAP27-3 **(Figure 8, point 1)**. Broadly speaking, VAPs serve to  
472 recruit other proteins or whole protein complexes to the ER membrane. If the client protein is  
473 embedded in another organellar membrane, this interaction by definition leads to the formation  
474 of a membrane contact site (James and Kehlenbach, 2021). VAP27-1 interacts with SEIPIN2  
475 and SEIPIN3 at ER-lipid droplet contact sites (Greer et al., 2020) and VAP27-3 recruits soluble  
476 oxysterol-binding protein-related protein ORP3a to the ER (Saravanan et al., 2009). At EPCSs,  
477 Arabidopsis VAP27-1 and VAP27-3 interact with clathrin and are required for normal rates of  
478 endocytosis, perhaps by recruiting clathrin to the PM (Stefano et al., 2018). Other VAP27-1  
479 interactors include PM intrinsic protein (PIP)2;5, an aquaporin (Fox et al., 2020), AtEH1/Pan1, a  
480 protein that recruits endocytic proteins to autophagosomes that form at VAP27-1-containing  
481 EPCSs (Wang et al., 2019), and the actin-binding protein NETWORKED 3C (Wang et al.,  
482 2014). The cytosolic domains of VAP27-1 and VAP27-3 can interact with phospholipids  
483 (Stefano et al., 2018), which raises the possibility they may not need to interact with a protein in  
484 another membrane to create a membrane contact site.

485

486 Here we add another VAP27 interactor, one that is associated with mechanical signaling.  
487 MSL10 signaling is hypothesized to be activated by membrane tension-induced conformational  
488 changes that lead to its dephosphorylation and the activation of its signaling function (Basu et  
489 al., 2020). One could imagine that such post-translational modifications disrupt the ability of  
490 MSL10 to interact with VAP27-1 and VAP27-3, thereby activating downstream responses.  
491 However, the fact that phosphomimetic (MSL10<sup>7D</sup>), phosphodead (MSL10<sup>7A</sup>), and gain-of-  
492 function *msl10-3G* (MSL10 S640L) versions all interacted with VAP27-1 and VAP27-3 **(Figure**  
493 **2-supplemental figure 1)** implies that MSL10 signaling activation is independent of VAP

494 binding. Rather, MSL10 and VAP27s are likely to interact constitutively, as they interacted both  
495 in adult leaves, a tissue type in which MSL10-GFP overexpression promotes cell death  
496 signaling (Veley et al., 2014) and in seedlings, a stage where MSL10-GFP overexpression has  
497 no effect under normal conditions (Basu and Haswell, 2020).

498  
499 MSL10 channel and cell death signaling activities are separable (Veley et al., 2014; Maksaev et  
500 al., 2018), and VAP27-1 or VAP27-3 could influence either or both of these functions (**Figure 8,**  
501 **point 2**). In *Zea mays*, interaction with VAP27-1 increases the ability of the PM-localized  
502 aquaporin *ZmPIP2;5* to transport water (Fox et al., 2020). Conversely, the mammalian Kv2.1 K<sup>+</sup>  
503 channel forms non-conducting clusters when it interacts with the VAP27-1 homologs VAPA and  
504 VAPB (O'Connell et al., 2010; Fox et al., 2013; Johnson et al., 2018). It will be interesting to test  
505 if association with VAP27-1 or VAP27-3 alters the channel properties of MSL10, such as its  
506 tension sensitivity. Alternatively, interaction with VAP27s could bring ER-localized regulators of  
507 MSL10 signaling into proximity, as is the case for an ER-bound phosphatase and its PM  
508 receptor substrate (Haj et al., 2012).

509

### 510 **3A. Point mutations in SYT5 and SYT7 suppress MSL10 signaling**

511 The *msl10-3G* suppressor screen produced two dominant extragenic *sdm* mutants that were  
512 successfully mapped to *SYT5* and *SYT7* genes (**Figures 4, 5**). Plant synaptotagmins and  
513 homologous proteins in mammals (extended-synaptotagmins, E-SYTs) and yeast (tricalbins)  
514 directly bridge the ER and PM via the interaction of their C2 domains with PM phospholipids  
515 (Schulz and Creutz, 2004; Min et al., 2007; Giordano et al., 2013; Schapire et al., 2008; Perez-  
516 Sancho et al., 2015; Ruiz-Lopez et al., 2021). E-SYTs and tricalbins non-selectively transport  
517 glycerolipids between membranes through their synaptotagmin-like mitochondrial lipid-binding  
518 (SMP) domains, and Arabidopsis SYT1 and SYT3 are hypothesized to transfer diacylglycerol  
519 from the PM to the ER during stress conditions (Ruiz-Lopez et al., 2021). The SYT5 S66F  
520 mutation (*sdm26* allele) occurs just outside of the predicted SMP domain of SYT5, and the  
521 SYT7 G427R mutation (*sdm34* allele) is found between two predicted C2 domains and near a  
522 coiled-coil domain (**Figure 5**). However, both *sdm* alleles were dominant, and both had the  
523 same effect of suppressing *msl10-3G* signaling (**Figure 8, point 3a**). Perhaps these lesions,  
524 which are in linker regions, influence the large-scale conformational changes that SYTs and E-  
525 SYTs are thought to undergo in the presence of Ca<sup>2+</sup> and certain PM phosphatidylinositol  
526 phosphates (Bian et al., 2018; Benavente et al., 2021). This could affect the distance between  
527 the ER and PM and the transport of lipids between them, creating a novel lipid environment

528 around MSL10 that might attenuate its ability to activate cell death signaling. Alternatively, the  
529 *sdm* mutations in SYT5 and SYT7 might alter the stoichiometry of other proteins at EPCSs, and  
530 in turn affect MSL10 function. To test these ideas, lipid transport, phospholipid binding, and  
531 interacting proteins should be compared between WT and mutant versions of SYT5 and SYT7.

532

### 533 **3B. SYT1-EPCSs are expanded in *msl10-3G* plants**

534 EPCSs in plant epidermal cells expand in response to environmental perturbations like cold and  
535 ionic stress (Lee et al., 2019, 2020; Ruiz-Lopez et al., 2021). We did not find a role for MSL10 in  
536 salinity or mannitol-induced EPCS expansion, nor in the shrinking observed after hypo-osmotic  
537 shock (**Figure 3-supplemental figure 1**). However, we did find that SYT1 EPCSs were  
538 constitutively expanded in leaf epidermal cells of adult *msl10-3G* plants (**Figure 3**). We did not  
539 observe expanded SYT5- or SYT7-EPCSs in *msl10-3G* plants (**Figure 7**). Although SYT1,  
540 SYT5, and SYT7 can interact with each other in immunoprecipitations of whole seedling  
541 extracts and in bimolecular fluorescence complementation assays (Ishikawa et al., 2020; Lee et  
542 al., 2020), perhaps they are not in a complex together in all cell types or developmental stages.

543

544 Why are SYT1-EPCSs expanded in *msl10-3G* leaves? We previously reported that the *msl10-*  
545 *3G* allele promotes a stronger cytosolic Ca<sup>2+</sup> transient in response to hypo-osmotic cell swelling  
546 than is seen in WT seedlings (Basu and Haswell, 2020). The affinity of SYT1 for PM  
547 phospholipids is partially dependent on Ca<sup>2+</sup> (Schapire et al., 2008; Perez-Sancho et al., 2015),  
548 suggesting that MSL10 could affect SYT1 function. Alternatively, perhaps EPCSs are expanded  
549 in *msl10-3G* cells because these cells are already ‘stressed’; *msl10-3G* plants constitutively  
550 express markers of wounding and abiotic stress (Zou et al., 2016; Basu et al., 2020). If  
551 overactive stress responses in *msl10-3G* plants increase PM phosphatidylinositol 4,5-  
552 biphosphate (PI(4,5)P<sub>2</sub>) levels, as wounding (Mosblech et al., 2008) or saline conditions (Lee et  
553 al., 2019) do, SYT1-EPCS expansion could be promoted. Both of these scenarios are  
554 consistent with the fact that we do not observe altered EPCSs in null *msl10-1* leaves. At the  
555 moment, the effects we observe on SYT1 area are limited to the gain-of-function *msl10-3G*  
556 allele.

557

558 However, we did find genetic interactions between the null *msl10-1* allele and a SYT1-GFP  
559 overexpression transgene (**Figure 3- Supplementary Table 1**). In addition, we were unable to  
560 isolate any adult plants overexpressing VAP27-3-GFP in either the null *msl10-1* or gain-of-  
561 function *msl10-3G* lines. Taken together, these unexpected genetic results may indicate that the

562 stoichiometry of proteins at plant EPCSs is tightly balanced, and that when disturbed,  
563 perturbations of components even in opposing directions can be detrimental. In support of this  
564 idea, VAP27-1 gain-of-function and loss-of-function lines both have abnormal root hairs (Wang  
565 et al., 2016). Transient overexpression of two EPCS proteins at the same time can drastically  
566 alter plant ER and EPCS morphology or even cause necrosis (Wang et al., 2016; Ruiz-Lopez et  
567 al., 2021). Additionally, a yeast strain missing all EPCS tethering proteins is viable but cannot  
568 tolerate the loss of *OSH4*, a redundant lipid-transport protein (Quon et al., 2018, 2022). Thus,  
569 we interpret the synthetic lethality of *MSL10* alleles and VAP27-3 or SYT1 overexpression  
570 transgenes as additional evidence that MSL10 functions at plant EPCSs, and we speculate that  
571 the ectopic cell death observed in plants overexpressing MSL10-GFP (Veley et al., 2014; Basu  
572 et al., 2020) may be a consequence of altered stoichiometry of EPCS proteins and/or  
573 dysfunction of EPCSs. Future studies should examine the dynamics of MSL10, SYTs, and  
574 VAP27s in the presence, absence, and overexpression of each other—similar to the study of  
575 (Siao et al., 2016)—to begin to understand the influence they have on each other.

576

#### 577 **Implications of having a mechanosensitive ion channel at EPCSs**

578 To our knowledge, MSL10 is the first mechanosensitive ion channel to be found at plant or  
579 animal EPCSs, but this may be an unsurprising location to find a mechanosensory protein in  
580 any system. It is hypothesized that plant EPCSs interact indirectly with the cell wall (Wang et al.,  
581 2017). VAP27-1 and SYT1 are found at Hechtian strands (Wang et al., 2016; Lee et al., 2020),  
582 sites of connection between the PM and the cell wall, and the mobility of VAP27-1 is  
583 constrained by the presence of a cell wall (Wang et al., 2016). Additionally, plant EPCSs link to  
584 the actin and microtubule cytoskeletons (Wang et al., 2014; Zang et al., 2021), which might  
585 convey or transduce mechanical information to or from the ER-PM-cell wall interface. By placing  
586 the mechanosensitive ion channel MSL10 at EPCSs, our results indicate that EPCSs will be an  
587 important nexus for understanding plant mechanotransduction cascades in a cellular context.

588

## 589 MATERIALS AND METHODS

590

### 591 Plant lines and growth conditions

592 All *Arabidopsis thaliana* lines used in this study are in the Col-0 ecotype. *msl10-3G* (*rea1*) seeds  
593 were derived from an ethyl methanesulfonate (EMS) mutant screen (Zou et al., 2016) and  
594 subsequently backcrossed twice (once to parental *RAP2.6::Luc* background and once to Col-0)  
595 to remove additional EMS-induced mutations. T-DNA insertion mutants *syt1* (SAIL\_775\_A08),  
596 *syt5* (SALK\_03961), and *syt7* (SALK\_006298) (Ishikawa et al., 2020) and *msl10-1* (Haswell et  
597 al., 2008) were obtained from the Arabidopsis Biological Resource Center. *UBQ:MAPPER-GFP*  
598 seeds were a gift from Abel Rosado (Lee et al., 2019). Unless otherwise specified, plants were  
599 grown on soil at 22°C under a constant light regime (120  $\mu\text{mol m}^{-2} \text{s}^{-1}$ ).

600

### 601 Genotyping

602 DNA was isolated by homogenizing tissue in 300  $\mu\text{L}$  crude extraction buffer (200 mM Tris-HCl  
603 pH 7.5, 250 mM NaCl, 250 mM EDTA, and 0.5% sodium dodecyl sulfate) followed by  
604 precipitation with an equal volume of isopropanol. Mutant lines were genotyped using the  
605 primers indicated in Table S1. The *msl10-3G* point mutation was genotyped using primers 663  
606 and 702 followed by digestion with the *Taq1* restriction enzyme, which cuts only the WT *MSL10*  
607 allele. The *sdm26* (*SYT5 S66F*) point mutation was genotyped using primers 4155 and 4156  
608 followed by digestion with the *Taq1* restriction enzyme, which cuts the mutant, but not WT *SYT5*  
609 sequence. The *sdm34* (*SYT7 G427R*) point mutation was genotyped using dCAPs primers 4231  
610 and 4232 and digestion with the *DdeI* enzyme, which cuts the mutant but not the WT *SYT7*  
611 allele

612

### 613 Cloning and generation of transgenic plants

614 To make *SYT5g S66F* and *SYT7g G427R* constructs, the *SYT5* and *SYT7* genomic sequences  
615 were amplified from pGWB553 *SYT5g-mRFP* and pGWB553 *SYT7g-mRFP* vectors (Ishikawa  
616 et al., 2020) which were a gift from Kazuya Ishikawa and cloned into the pENTR vector using  
617 the pENTR/D-TOPO Cloning Kit (Thermo Fisher). These pENTR constructs were used as  
618 templates for site-directed mutagenesis to introduce *SYT5 S66F* or *SYT7 G427R* mutations  
619 (primers in Table S1) The mutated genomic sequences were subcloned back into pGWB553  
620 vectors using Gibson assembly with NEBuilder Hifi DNA Assembly Master Mix (NEB). The WT  
621 constructs included a C-terminal mRFP tag (Ishikawa et al., 2020), and the *sdm* constructs had  
622 a short, 31aa tag before an early stop codon was reached. The resulting constructs were



623 transformed into *msl10-3G* plants using *Agrobacterium tumefaciens* GV3101 and the floral dip  
624 method (Clough and Bent, 1998). T1 individuals were identified based on hygromycin  
625 resistance.

626  
627 To make *UBQ:SYT1-GFP*, *UBQ:SYT5-GFP*, *UBQ:SYT7-GFP*, *UBQ:VAP27-1-GFP*, and  
628 *UBQ:VAP27-3-GFP* constructs, the *SYT1*, *SYT5*, *SYT7*, *VAP27-1*, and *VAP27-3* coding  
629 sequences were amplified from Col-0 cDNA using primers in Table S1 and cloned into pENTR  
630 using pENTR/D-TOPO, then subcloned into the pUBC-GFP-DEST vector (Grefen et al., 2010)  
631 using LR Clonase II (Thermo Fisher recombination. The resulting constructs were transformed  
632 introduced into Col-0 plants and transformed individuals were identified based on Basta  
633 resistance. T2 plants with moderate GFP fluorescence were crossed to *msl10-1* and *msl10-3G*  
634 plants, and homozygous F2 siblings were identified by genotyping and by screening for Basta  
635 resistance. To make *UBQ:mRFP-VAP27-1*, *UBQ:mRFP-VAP27-3*, *UBQ:SYT1-mRFP*,  
636 *UBQ:SYT5-mRFP*, *UBQ:SYT7-mRFP*, and *UBQ:MSL10-GFP*, Clonase II recombination was  
637 used to subclone the coding sequences of *VAP27-1* and *VAP27-3* from pENTR into the pUBN-  
638 RFP-DEST vector, *SYT1*, *SYT5*, and *SYT7* into pUBC-RFP-DEST, and *MSL10* into pUBC-GFP-  
639 DEST (Grefen et al., 2010).

640  
641 To make *pK7-mRFP-VAP27-3g*, the *VAP27-3* genomic sequences were amplified from Col-0  
642 genomic DNA. Using Gibson assembly, this was cloned into the *pK7FWG2* vector backbone,  
643 deleting the GFP tag and adding an N-terminal mRFP tag. For co-localization studies, this  
644 construct was transformed into Col-0 plants expressing a *MSL10p:MSL10-GFP* transgene  
645 (Haswell et al., 2008). T1 plants were identified by kanamycin resistance.

646

#### 647 **Microsome isolation and immunoprecipitation**

648 Seeds of Col-0 and *35S:MSL10-GFP* (line 12-3, (Veley et al., 2014; Basu et al., 2020b)) were  
649 densely sown on 1X Murashige and Skoog (MS) plates supplemented with 3% sucrose and  
650 grown vertically for 7 days in a 16 hr light/8 hr dark regime. Seedlings (1 g per replicate) were  
651 flash frozen in liquid nitrogen and homogenized to a fine powder using a mortar and pestle.  
652 Protein extraction and microsome isolation protocols were modified from (Abas and Luschnig,  
653 2010). 1.5 mL of extraction buffer (100 mM Tris-HCl pH 7.5, 25% sucrose, 5% glycerol, 3.3%  
654 polyvinylpyrrolidone, 10 mM EDTA, 10 mM EGTA, 5 mM KCl, 1 mM DTT, 0.1 mM PMSF, 2  $\mu$ M  
655 leupeptin, 1  $\mu$ M pepstatin, 1X plant protease inhibitor cocktail (Sigma P9599), and 1X  
656 phosphatase inhibitor cocktails 2 (Sigma P5726) and 3 (Sigma P0044)) was added directly to

657 the mortar and samples were homogenized in buffer for 2 min, then transferred to 1.5 mL tubes  
658 and incubated on ice for 10 min. Homogenates were centrifuged at 600g for 3 min (1 replicate)  
659 or 10,000g for 10 min (3 replicates) at 4°C to pellet cell debris and organelles. The supernatant  
660 was transferred to fresh tubes on ice, and the pellets were resuspended in half of the initial  
661 volume of extraction buffer, using small plastic pestles. Resuspensions were centrifuged as  
662 above. Pooled supernatants were diluted 1:1 with ddH<sub>2</sub>O, then divided among 1.5 mL tubes,  
663 each with a maximum volume of 200 μL. Microsomes were pelleted by centrifugation at  
664 21,000g for 2 hr at 4°C, and the supernatant was discarded.

665  
666 Microsomal pellets were then resuspended in a total volume of 0.5 mL solubilization buffer (20  
667 mM Tris-HCl pH 7.5, 150 mM NaCl, 2 mM EDTA, 10% glycerol, 0.5% Triton X-100, 0.25% NP-  
668 40, 0.1 mM PMSF, 2 μM leupeptin, 1 μM pepstatin, 1X plant protease inhibitor cocktail, and 1X  
669 phosphatase inhibitor cocktails 2 and 3) using small plastic pestles. Resuspended microsomes  
670 were incubated with end-over-end rotation at 4°C for 1 hr. Meanwhile, 65 μL of GFP-Trap  
671 Magnetic Agarose beads (Chromotek) per sample was prepared by washing twice with 1 mL 10  
672 mM Tris-HCl, 150 mM NaCl, 0.5 mM EDTA. To this was added 400 μL of solubilized  
673 microsomes and 100 μL of solubilization buffer. Proteins were immunoprecipitated overnight  
674 with end-over-end rotation at 4°C. Beads were collected with a magnetic rack, and the flow-  
675 through was discarded. Beads were washed 3 times with 1 mL IP Wash Buffer 1 (20 mM Tris-  
676 HCl pH 7.5, 150 mM NaCl, 10% glycerol, 2 mM EDTA, 1% Triton X-100, and 0.5% NP-40), then  
677 6 times with IP Wash Buffer 2 (20 mM Tris-HCl pH 7.5, 150 mM NaCl, 10% glycerol, 2 mM  
678 EDTA), switching to fresh tubes every other wash.

679

### 680 **Tandem mass spectrometry**

681 Proteins were eluted from the GFP-Trap beads by adding 100 μL of 8 M urea, then reduced in  
682 10 mM dithiothreitol for 1 hr at RT, and alkylated in the dark (50 mM 2-iodoacetamide) for 1 hr at  
683 RT. Excess alkylating agent was quenched with 50 mM dithiothreitol for 5 min at RT. Samples  
684 were diluted with 900 μL of 25 mM ammonium bicarbonate and digested overnight at 37°C in the  
685 presence of 0.35 μg of sequencing grade modified porcine trypsin (Promega). Peptides were  
686 vacuum-dried in a centrifugal evaporator to approximately 250 μL, acidified with 10%  
687 trifluoroacetic acid (TFA) (pH<3), desalted and concentrated on a 100 μL Bond Elut™ OMIX C18  
688 pipette tip (Agilent Technologies A57003100) according to the manufacturer's instructions.  
689 Peptides were eluted in 50 μL of 75% acetonitrile, 0.1% acetic acid, vacuum dried in a centrifugal

690 evaporator (Savant Instruments, model number SUC100H), and resuspended in 17  $\mu$ l 5%  
691 acetonitrile, 0.1% formic acid.

692  
693 Nano-scale liquid chromatography (LC) separation of tryptic peptides was performed on a  
694 Dionex Ultimate™ 3000 Rapid Separation LC system (Thermo Fisher). The protein digests were  
695 loaded onto a 20  $\mu$ l nanoViper sample loop (Thermo Fisher), and separated on a C18 analytical  
696 column (Acclaim PepMap RSLC C18 column, 2  $\mu$ m particle size, 100 Å pore size, 75  $\mu$ m x 25  
697 cm (Thermo Fisher)) by the application of a linear 2 hr gradient from 4% to 36% acetonitrile in  
698 0.1% formic acid, with a column flow rate set to 250 nL/min. Analysis of the eluted tryptic  
699 peptides was performed online using a Q Exactive™ Plus mass spectrometer (Thermo  
700 Scientific) possessing a Nanospray Flex™ Ion source (Thermo Fisher) fitted with a stainless  
701 steel nano-bore emitter operated in positive electro-spray ionisation (ESI) mode at a capillary  
702 voltage of 1.9 kV. Data-dependent acquisition of full MS scans within a mass range of 380-1500  
703 m/z at a resolution of 70,000 was performed, with the automatic gain control (AGC) target set to  
704  $3.0 \times 10^6$ , and the maximum fill time set to 200 ms. High energy collision-induced dissociation  
705 (HCD) fragmentation of the top 8 most intense peaks was performed with a normalized collision  
706 energy of 28, with an intensity threshold of  $4.0 \times 10^4$  counts and an isolation window of 3.0 m/z,  
707 excluding precursors that had an unassigned, +1 or >+7, charge state. MS/MS scans were  
708 conducted at a resolution of 17,500, with an AGC target of  $2 \times 10^5$  and a maximum fill time of  
709 300 ms. Dynamic exclusion was performed with a repeat count of 2 and an exclusion duration of  
710 30sec, while the minimum MS ion count for triggering MS/MS was set to  $4 \times 10^4$  counts. The  
711 resulting MS/MS spectra were analyzed using Proteome Discoverer™ software (version  
712 2.0.0.802, Thermo Fisher), which was set up to search the *Arabidopsis thaliana* proteome  
713 database, as downloaded from [www.tair.com](http://www.tair.com) (TAIR10\_pep\_20101214). Peptides were  
714 assigned using SEQUEST HT (Eng et al., 1994), with search parameters set to assume the  
715 digestion enzyme trypsin with a maximum of 1 missed cleavage, a minimum peptide length of 6,  
716 precursor mass tolerances of 10 ppm, and fragment mass tolerances of 0.02 Da.

717 Carbamidomethylation of cysteine was specified as a static modification, while oxidation of  
718 methionine and N-terminal acetylation were specified as dynamic modifications. The target false  
719 discovery rate (FDR) of 0.01 (strict) was used as validation for peptide-spectral matches (PSMs)  
720 and peptides. Proteins that contained similar peptides and which could not be differentiated  
721 based on the MS/MS analysis alone were grouped, to satisfy the principles of parsimony. Label-  
722 free quantification as previously described (Silva et al., 2006) was performed in Proteome  
723 Discoverer™ with a minimum Quan value threshold of 0.0001 using unique peptides, and “3

724 Top N” peptides used for area calculation. All samples were injected in duplicate, and the  
725 resulting values were averaged. The mass spectrometry proteomics data have been deposited  
726 to the ProteomeXchange Consortium via the PRIDE partner repository (Perez-Riverol et al.,  
727 2019) with the dataset identifier PXD018747.

728  
729 Using the Perseus platform (Tyanova et al., 2016), intensity values from mass spectrometry  
730 were log<sub>2</sub> imputed and missing values were replaced with random numbers from a Gaussian  
731 distribution with a width of 0.3 and a downshift of 1.8. Statistical significance was determined  
732 using t-tests. Only proteins with > 8 peptide spectrum matches were included in volcano plots.

733

### 734 **Mating-based split ubiquitin (mbSUS) assay**

735 The coding sequence for the 14 proteins selected from the MSL10 interactome were amplified  
736 from Col-0 cDNA using primers in Table S1 and cloned into *pENTR* using pENTR/D-TOPO,  
737 then subcloned into the *pK7FWG2* destination vector (Karimi et al., 2002) or BiFC destination  
738 vectors (Gehl et al., 2009) using LR Clonase II recombination. These constructs were used as  
739 templates for PCR amplification with attB1 For and attB2 Rev primers (Table S1). Following the  
740 protocol of (Obrdlik et al., 2004; Basu et al., 2020b), attB-flanked inserts were combined with  
741 linearized vectors and transformed into yeast for recombinational *in vivo* cloning. Inserts were  
742 cloned into *pMetYCGate* for a C-terminal fusion with Cub, *pXNGate21-3HA* for a C-terminal  
743 fusion with NubG, or *pNXgate33-3HA* for an N-terminal NubG fusion. For integral membrane  
744 proteins split-ubiquitin tags were predicted to lie in the cytosol. For soluble proteins, the NubG  
745 tag was placed on the terminus where fusions had previously reported to be tolerated (or, for  
746 unstudied proteins, where homologous proteins had been tagged). NubG vectors and inserts  
747 were transformed into THY.AP5 cells and selected on Synthetic Complete (SC) plates lacking  
748 tryptophan and uracil. Cub vectors and inserts were transformed into THY.AP4 cells and  
749 selected on SC plates lacking leucine. Transformed cells were mated and diploids selected on  
750 SC media lacking tryptophan, uracil, and leucine. Overnight cultures of diploid cells were  
751 pelleted, resuspended in dH<sub>2</sub>O to an OD<sub>600</sub> of 1.0, and 4 μL of a 10X dilution series were spotted  
752 onto Synthetic Minimal (SD) or SC+Ade+His media. Growth was assessed 3 days after plating;  
753 growth on SC+Ade+His media tested the presence of both constructs. To quantify the strength  
754 of interactions, β-galactosidase activity in liquid cultures was assayed using CPRG as substrate  
755 as described in the Yeast Protocols Handbook (Takara).

756

### 757 **FRET-FLIM**

758 *UBQ:mRFP-VAP27-1*, *UBQ:mRFP-VAP27-3*, *UBQ:SYT1-mRFP*, *UBQ:SYT5-mRFP*,  
759 *UBQ:SYT7-mRFP*, and *UBQ:MSL10-GFP* plasmids were transformed into *A. tumefaciens*  
760 GV3101. Following the protocol of (Waadt and Kudla, 2008), construct pairs were co-infiltrated  
761 into *Nicotiana benthamiana* leaves along with *A. tumefaciens* strain AGL-1, which harbors p19  
762 to suppress gene silencing. 5 days post-infiltration, leaves were imaged using a Leica TCS SP8  
763 Multiphoton microscope fitted with an HC PL IRAPO 40x/1.10 WATER objective. The tunable  
764 multiphoton laser was adjusted to its optimum excitation for EGFP (920 nm), and fluorescence  
765 lifetimes were recorded in an emission range of 595-570 nm. Using the Leica LASX software's  
766 FLIM tool, an n-Exponential Reconvolution model with one component was used to calculate  
767 the average fluorescence lifetime of GFP per image.

768

### 769 **Co-localization analysis**

770 Leaves of plants co-expressing *MSL10p:MSL10-GFP* and *mRFP-VAP27-3g* were imaged using  
771 an Olympus FV3000 confocal microscope with a UPLSAPO 100XS oil-immersion objective. 8 to  
772 12 Z-slices were captured at the equator of abaxial leaf epidermal cells, and these Z-stacks  
773 were deconvolved. For each image, ROIs were defined at the periphery of 4 different cells. Co-  
774 localization was quantified using the 'Co-localization' tool of the Olympus cellSens software,  
775 using the 'Rectangle' mode to automatically estimate thresholds, and the mean of the Mander's  
776 coefficients was calculated from the 4 ROIs in 4 Z-slices.

777

### 778 **Confocal microscopy and quantification of ER-plasma membrane contact sites**

779 Lines expressing MAPPER-GFP, SYT1-GFP, SYT5-GFP, SYT7-GFP, VAP27-1-GFP, and  
780 VAP27-3-GFP under the control of the *UBQ10* promoter were visualized using an Olympus  
781 FV3000 confocal microscope with a UPLSAPO 100XS oil-immersion objective. GFP was  
782 excited using a 488nm laser and detected in the 500-540nm range. Chlorophyll  
783 autofluorescence was excited by the same laser and detected in the 650-750nm range. Z-  
784 stacks were taken of abaxial leaf epidermal cells beginning at the top of the cell and ending with  
785 an equatorial slice. Z-stacks were deconvolved with the Olympus CellSens software using the  
786 Advanced Maximum Likelihood Algorithm with 5 iterations. The area of MAPPER-GFP or SYT1-  
787 GFP puncta were quantified using Fiji (Schindelin et al., 2012). Deconvolved Z-stacks were  
788 converted to a Z-projection (sum slices for MAPPER-GFP and maximum intensity for SYT1-  
789 GFP) and the area of each cell was traced and set as an ROI, excluding the periphery of cells  
790 where puncta were typically overlapping. After thresholding (between 25-255 for MAPPER-GFP

791 and 100-255 for SYT1-GFP, the 'Analyze Particles' function was used to quantify the % of cell  
792 area that the puncta represented for each ROI.

793

#### 794 **Identification of *suppressed death from msl10-3G (sdm)* mutants**

795 250 mg of backcrossed *msl10-3G* seeds (approximately 12,500 seeds) were treated with 0.4%  
796 ethyl methanesulfonate (EMS) as described in (Kim et al., 2006). Mutagenized seeds were  
797 sown directly on soil in 40 pools, stratified for 2 days at 4°C, then transferred to a 22°C growth  
798 chamber. *sdm* mutants were identified based on increased height compared to parental *msl10-*  
799 *3G* plants 4-5 weeks after sowing, each from individual pools. When multiple plants with *sdm*  
800 phenotypes were seen in the same M2 pool they were assumed to be from the same parent.  
801 *sdm* mutants were genotyped to ensure they had the *msl10-3G* point mutation. To see if *sdm*  
802 mutants harbored second-site mutations in the *MSL10* gene, the locus was PCR amplified using  
803 primers 3781 and 3782 and Sanger-sequenced using primers 663, 699, 701, 1611, 2227, and  
804 3789 (Table S1).

805

806 *sdm26* and *sdm34* were backcrossed to *msl10-3G* plants, and rosette leaves from 30-50 F2  
807 progeny were separated into two pools based on phenotype: *msl10-3G* (dwarfed) or *sdm*  
808 (suppressed). Genomic DNA was extracted from pooled tissue following the protocol described  
809 in (Thole et al., 2014) and submitted to the Genome Technology Access Center at the  
810 McDonnell Genome Institute (GTAC@MGI) at the WUSTL Medical Center. Libraries were  
811 prepared using the Kapa HyperPrep Kit PCR-free (Roche) and sequenced on an Illumina  
812 NovaSeq 6000 S4 Flowcell using 150 nt paired-end reads and 80X coverage. GTAC@MGI  
813 aligned reads to the *Arabidopsis thaliana* Col-0 reference genome (TAIR10.1 assembly), called  
814 variants using SAMtools (Li et al., 2009), and annotated them using snpEff (Cingolani et al.,  
815 2014). Variants were filtered to include those with a quality score of >20 and a total depth of >5.  
816 SNPs that were present in multiple *sdm* mutants were removed, as they were likely present in  
817 the parental *msl10-3G* line. For each of the retained SNPs, the allele frequency  
818 (mutant/reference) was plotted against chromosomal position.

819

#### 820 **Alignment of SYT5 and SYT7 protein sequences**

821 SYT5 and SYT7 homologs in other plant species were identified using the BLAST tools in  
822 Phytozome 13 or NCBI using the *Arabidopsis* SYT5 and SYT7 amino acid sequences as  
823 queries. To remove sequences that were orthologous to other *Arabidopsis* synaptotagmins, we  
824 aligned the obtained sequences to the protein sequences of the 7 known synaptotagmins in

825 Arabidopsis and constructed a Neighbor-Joining phylogenetic tree in Mega 11. We then  
826 considered only those sequences that were in the same clade as *AtSYT5* or *AtSYT7* to be  
827 SYT5 or SYT7 homologs. SYT5 homologs identified with this method and shown in Figure 5c  
828 have the following accession numbers from Phytozome: *B. rapa* B.rapaFPsc  
829 v1.3|Brara.J00373.1.p, *V. Vinifera* v2.1|VIT\_211s0118g00230.2, *P. trichocarpa*  
830 v4.1|Potri.018G025000.3.p, *O. sativa* v7.0|LOC\_Os04g55220.1, *B. distachyon*  
831 v3.2|Bradi5g23880.2.p. From NCBI: *N. tabacum* XP\_016446163.1. SYT7 homologs identified in  
832 Phytozome include *B. rapa* B.rapaFPsc v1.3|Brara.D00127.1.p, *V. vinifera*  
833 v2.1|VIT\_215s0048g01410.1, *P. trichocarpa* v4.1|Potri.014G072800.2.p, *O. sativa*  
834 v7.0|LOC\_Os07g22640.1, *B. distachyon* v3.2|Bradi1g52680.1.p. From NCBI: *N. tabacum*  
835 XP\_016486625.1.

836

### 837 **Immunoblotting**

838 Rosette leaves were flash frozen and homogenized in a microcentrifuge tube using a small  
839 plastic pestle. 4  $\mu$ L of 2X sample buffer was added for every 1 mg of tissue, then this mixture  
840 was denatured for 10 min at 70°C and cell debris pelleted by centrifugation at 5000g for 1 min.  
841 Supernatants were resolved on 10% SDS-PAGE gels and transferred overnight to PVDF  
842 membranes (BioRad) at 100 mA. Blocking and antibody incubations were performed in 5% non-  
843 fat dry milk in 1X TBS-T buffer. MSL10 tagged with GFP was detected using an anti-GFP  
844 antibody (Takara #632380) for 16 hr at a dilution of 1:5000, followed by a 1 hr incubation in  
845 HRP-conjugated goat-anti-mouse secondary antibody at a 1:10,000 dilution (Millipore-Sigma  
846 #12-349). Blots were stripped and re-probed with anti- $\alpha$ -tubulin (Millipore-Sigma T5168,  
847 1:30,000 dilution) for 1 hr. Proteins were detected using the SuperSignal West Dura Extended  
848 Duration Substrate (Thermo Fisher).

849

### 850 **Gene expression analysis**

851 Rosette leaves were flash frozen in liquid nitrogen and homogenized into a powder. RNA was  
852 extracted using RNeasy Kit (Qiagen) following the manufacturer's instructions for plant RNA  
853 isolation and on-column DNase digestion. cDNA was synthesized using M-MLV reverse  
854 transcriptase (Promega) and oligo(dT) priming. qRT-PCR was performed in technical triplicate  
855 using the SYBR Green PCR Master Mix (Thermo Fisher) kit, with primers specific to *SYT5*,  
856 *SYT7*, or *ELONGATION FACTOR 1 $\alpha$*  (*EF1 $\alpha$* ) transcripts (Table S1) on a StepOne Plus Real-  
857 time PCR System (Applied Biosystems).

858

## 859 **Accession numbers**

860 The genes utilized in this study have the following Arabidopsis Genome Initiative locus codes:  
861 *MSL10* (*At5G12080*), *VAP27-1* (*At3G60600*), *VAP27-3* (*At2G45140*), *SYT1* (*At2G20990*), *SYT5*  
862 (*At1G05500*), *SYT7* (*At3G61050*), *ACTIN 8* (*ACT8*, *At1G49240*), *DYNAMIN-LIKE 1* (*DL1*,  
863 *At5G42080*), *RAB GTPase homolog 1C* (*RAB1c*, *At4G17530*), *METHIONINE*  
864 *OVERACCUMULATOR 3* (*MTO3*, *At3G17390*), *COATOMER ALPHA-1 SUBUNIT* ( $\alpha$ *COP1*,  
865 *At1G62020*), unnamed protein with a carbohydrate-binding like fold (*At3G62360*), unnamed  
866 protein- M28 Zn-peptidase nicastrin (*At3G44330*), *RAS-RELATED NUCLEAR PROTEIN 1*  
867 (*RAN1*, *At5G20010*), *CATALASE 2* (*CAT2*, *At4G35090*), *LOW EXPRESSION OF*  
868 *OSMOTICALLY RESPONSIVE GENES* (*LOS1*, *At1G56070*), *REGULATORY PARTICLE*  
869 *TRIPLE-A 1A* (*RPT1a*, *At1g53750*), *POTASSIUM CHANNEL IN ARABIDOPSIS THALIANA 1*  
870 (*KAT1*, *At5G46240*).

871

## 872 **Statistical analyses**

873 Statistical analyses were performed in R Studio (v4.1.2), except for Chi-squared tests which  
874 were performed in Microsoft Excel. Shapiro-Wilk tests were used to test for normality. The *car*  
875 and *agricolae* packages were used to perform ANOVAs and indicated post-hoc tests, and *FSA*  
876 and *rcompanion* packages for Kruskal-Wallis and Dunn's post-hoc tests. Data was visualized  
877 using R Studio *ggplot2*, GraphPad Prism 7, and Excel. The Venn diagram shown in Figure 1b  
878 was created using <http://bioinformatics.psb.ugent.be/webtools/Venn/>.

879

## 880 **ACKNOWLEDGEMENTS**

881 We thank Fionn McLoughlin for performing mass spectrometry experiments and for helpful  
882 guidance about immunoprecipitations and data analysis. These experiments were performed at  
883 the proteomic facility in the Biology Department at Washington University in St. Louis. Heather  
884 Grossman generated the amino acid alignments in Figure 5c. Kazuya Ishikawa (Utsonomiya  
885 University) provided *SYT5g-mRFP* and *SYT7g-mRFP* plasmids and shared their full SYT1  
886 immunoprecipitation-mass spectrometry dataset. Abel Rosado (University of British Columbia)  
887 provided the *UBQ:MAPPER-GFP* line. We thank the staff of the Jeanette Goldfarb Plant Growth  
888 Facility for plant growth assistance. Whole genome sequencing in this publication was made  
889 possible in part by Grant Number UL1 RR024992 from the NIH-National Center for Research  
890 Resources (NCRR). This work was supported by HHMI-Simons Faculty Scholar Grant  
891 55108530 to E. S. H., National Science Foundation grant MCB 1253103 to E. S. H., and the  
892 NSF Center for Engineering Mechanobiology grant CMMI-1548571. J.M.C. was supported by



893 NSF Graduate Research Fellowship DGE-1745038 and a William H. Danforth Plant Sciences  
894 Fellowship. Figure 8 was created using BioRender.com.

895

896 **COMPETING INTERESTS**

897 The authors declare no conflicts of interest.

898

899

900 **REFERENCES**

- 901
- 902 Abas, L., Luschnig, C., 2010. Maximum yields of microsomal-type membranes from small  
903 amounts of plant material without requiring ultracentrifugation. *Analytical Biochemistry*  
904 401, 217–227. <https://doi.org/10.1016/j.ab.2010.02.030>
- 905 Árnadóttir, J., Chalfie, M., 2010. Eukaryotic Mechanosensitive Channels. *Annu. Rev. Biophys.*  
906 39, 111–137. <https://doi.org/10.1146/annurev.biophys.37.032807.125836>
- 907 Basu, D., Codjoe, J., Velej, K., Haswell, E., 2021. The mechanosensitive ion channel MSL10  
908 modulates susceptibility to *Pseudomonas syringae* in *Arabidopsis thaliana*. *Molecular*  
909 *Plant-Microbe Interactions*®. <https://doi.org/10.1094/MPMI-08-21-0207-FI>
- 910 Basu, D., Haswell, E.S., 2020. The mechanosensitive ion channel MSL10 potentiates  
911 responses to cell swelling in *Arabidopsis* seedlings. *Current Biology* 30, 2716-2728.  
912 <https://doi.org/10.1016/j.cub.2020.05.015>
- 913 Basu, D., Shoots, J.M., Haswell, E.S., 2020. Interactions between the N- and C-termini of the  
914 mechanosensitive ion channel AtMSL10 are consistent with a three-step mechanism for  
915 activation. *Journal of Experimental Botany* 71, 4020–4032.  
916 <https://doi.org/10.1093/jxb/eraa192>
- 917 Benavente, J.L., Siliqi, D., Infantes, L., Lagartera, L., Mills, A., Gago, F., Ruiz-López, N., Botella,  
918 M.A., Sánchez-Barrena, M.J., Albert, A., 2021. The structure and flexibility analysis of  
919 the *Arabidopsis* synaptotagmin 1 reveal the basis of its regulation at membrane contact  
920 sites. *Life Science Alliance* 4, e202101152. <https://doi.org/10.26508/lsa.202101152>
- 921 Bian, X., Saheki, Y., Camilli, P.D., 2018. Ca<sup>2+</sup> releases E-Syt1 autoinhibition to couple ER-  
922 plasma membrane tethering with lipid transport. *The EMBO Journal* 37, 219–234.  
923 <https://doi.org/10.15252/emj.201797359>
- 924 Booth, I.R., Miller, S., Müller, A., Lehtovirta-Morley, L., 2015. The evolution of bacterial  
925 mechanosensitive channels. *Cell Calcium* 57, 140–150.  
926 <https://doi.org/10.1016/j.ceca.2014.12.011>
- 927 Chang, C.-L., Hsieh, T.-S., Yang, T.T., Rothberg, K.G., Azizoglu, D.B., Volk, E., Liao, J.-C.,  
928 Liou, J., 2013. Feedback regulation of receptor-induced Ca<sup>2+</sup> signaling mediated by E-  
929 Syt1 and Nir2 at endoplasmic reticulum-plasma membrane junctions. *Cell Reports* 5,  
930 813–825. <https://doi.org/10.1016/j.celrep.2013.09.038>
- 931 Cingolani, P., Platts, A., Wang, L.L., Coon, M., Nguyen, T., Wang, L., Land, S.J., Lu, X., Ruden,  
932 D.M., 2014. A program for annotating and predicting the effects of single nucleotide  
933 polymorphisms, SnpEff. *Fly* 6, 80–92. <https://doi.org/10.4161/fly.19695>

- 934 Clough, S.J., Bent, A.F., 1998. Floral dip: a simplified method for *Agrobacterium*-mediated  
935 transformation of *Arabidopsis thaliana*. *The Plant Journal* 16, 735–743.  
936 <https://doi.org/10.1046/j.1365-313x.1998.00343.x>
- 937 Codjoe, J.M., Miller, K., Haswell, E.S., 2021. Plant cell mechanobiology: greater than the sum of  
938 its parts. *The Plant Cell* 34, 129-145. koab230. <https://doi.org/10.1093/plcell/koab230>
- 939 Eng, J.K., McCormack, A.L., Yates, J.R., 1994. An approach to correlate tandem mass spectral  
940 data of peptides with amino acid sequences in a protein database. *Journal of the*  
941 *American Society for Mass Spectrometry* 5, 976–989. [https://doi.org/10.1016/1044-](https://doi.org/10.1016/1044-0305(94)80016-2)  
942 [0305\(94\)80016-2](https://doi.org/10.1016/1044-0305(94)80016-2)
- 943 Fox, A.R., Scochera, F., Laloux, T., Filik, K., Degand, H., Morsomme, P., Alleva, K., Chaumont,  
944 F., 2020. Plasma membrane aquaporins interact with the endoplasmic reticulum resident  
945 VAP27 proteins at ER–PM contact sites and endocytic structures. *New Phytologist* 228,  
946 973–988. <https://doi.org/10.1111/nph.16743>
- 947 Fox, P.D., Haberkorn, C.J., Akin, E.J., Seel, P.J., Krapf, D., Tamkun, M.M., 2015. Induction of  
948 stable ER–plasma-membrane junctions by Kv2.1 potassium channels. *Journal of Cell*  
949 *Science* 128, 2096–2105. <https://doi.org/10.1242/jcs.166009>
- 950 Fox, P.D., Loftus, R.J., Tamkun, M.M., 2013. Regulation of Kv2.1 K<sup>+</sup> conductance by cell  
951 surface channel density. *Journal of Neuroscience* 33, 1259–1270.  
952 <https://doi.org/10.1523/JNEUROSCI.3008-12.2013>
- 953 Gehl, C., Waadt, R., Kudla, J., Mendel, R.-R., Hänsch, R., 2009. New GATEWAY vectors for  
954 high throughput analyses of protein–protein interactions by bimolecular fluorescence  
955 complementation. *Molecular Plant* 2, 1051–1058. <https://doi.org/10.1093/mp/ssp040>
- 956 Giordano, F., Saheki, Y., Idevall-Hagren, O., Colombo, S.F., Pirruccello, M., Milosevic, I.,  
957 Gracheva, E.O., Bagriantsev, S.N., Borgese, N., De Camilli, P., 2013. PI(4,5)P<sub>2</sub>-  
958 dependent and Ca<sup>2+</sup>-regulated ER-PM interactions mediated by the extended  
959 synaptotagmins. *Cell* 153, 1494–1509. <https://doi.org/10.1016/j.cell.2013.05.026>
- 960 Greer, M.S., Cai, Y., Gidda, S.K., Esnay, N., Kretschmar, F.K., Seay, D., McClinchie, E.,  
961 Ischebeck, T., Mullen, R.T., Dyer, J.M., Chapman, K.D., 2020. SEIPIN isoforms interact  
962 with the membrane-tethering protein VAP27-1 for lipid droplet formation. *The Plant Cell*  
963 32, 2932–2950. <https://doi.org/10.1105/tpc.19.00771>
- 964 Grefen, C., Donald, N., Hashimoto, K., Kudla, J., Schumacher, K., Blatt, M.R., 2010. A ubiquitin-  
965 10 promoter-based vector set for fluorescent protein tagging facilitates temporal stability  
966 and native protein distribution in transient and stable expression studies. *The Plant*  
967 *Journal* 64, 355–365. <https://doi.org/10.1111/j.1365-313X.2010.04322.x>

- 968 Haj, F.G., Sabet, O., Kinkhabwala, A., Wimmer-Kleikamp, S., Roukos, V., Han, H.-M.,  
969 Grabenbauer, M., Bierbaum, M., Antony, C., Neel, B.G., Bastiaens, P.I., 2012.  
970 Regulation of signaling at regions of cell-cell contact by endoplasmic reticulum-bound  
971 protein-tyrosine phosphatase 1B. *PLOS ONE* 7, e36633.  
972 <https://doi.org/10.1371/journal.pone.0036633>
- 973 Hamilton, E.S., Schlegel, A.M., Haswell, E.S., 2015. United in diversity: mechanosensitive ion  
974 channels in plants. *Annual Review of Plant Biology* 66, 113–137.  
975 <https://doi.org/10.1146/annurev-arplant-043014-114700>
- 976 Haswell, E.S., Peyronnet, R., Barbier-Brygoo, H., Meyerowitz, E.M., Frachisse, J.-M., 2008.  
977 Two MscS homologs provide mechanosensitive channel activities in the Arabidopsis  
978 root. *Current Biology* 18, 730–734. <https://doi.org/10.1016/j.cub.2008.04.039>
- 979 Ho, C.-M.K., Paciorek, T., Abrash, E., Bergmann, D.C., 2016. Modulators of stomatal lineage  
980 signal transduction alter membrane contact sites and reveal specialization among  
981 ERECTA kinases. *Developmental Cell* 38, 345–357.  
982 <https://doi.org/10.1016/j.devcel.2016.07.016>
- 983 Ishikawa, K., Tamura, K., Fukao, Y., Shimada, T., 2020. Structural and functional relationships  
984 between plasmodesmata and plant endoplasmic reticulum–plasma membrane contact  
985 sites consisting of three synaptotagmins. *New Phytologist* 1–11.  
986 <https://doi.org/10.1111/nph.16391>
- 987 James, C., Kehlenbach, R.H., 2021. The Interactome of the VAP family of proteins: An  
988 overview. *Cells* 10, 1780. <https://doi.org/10.3390/cells10071780>
- 989 Johnson, B., Leek, A.N., Solé, L., Maverick, E.E., Levine, T.P., Tamkun, M.M., 2018. Kv2  
990 potassium channels form endoplasmic reticulum/plasma membrane junctions via  
991 interaction with VAPA and VAPB. *Proceedings of the National Academy of Sciences*  
992 115, E7331–E7340. <https://doi.org/10.1073/pnas.1805757115>
- 993 Karimi, M., Inzé, D., Depicker, A., 2002. GATEWAY™ vectors for Agrobacterium-mediated plant  
994 transformation. *Trends in Plant Science* 7, 193–195. [https://doi.org/10.1016/S1360-1385\(02\)02251-3](https://doi.org/10.1016/S1360-1385(02)02251-3)
- 996 Kefauver, J.M., Ward, A.B., Patapoutian, A., 2020. Discoveries in structure and physiology of  
997 mechanically activated ion channels. *Nature* 587, 567–576.  
998 <https://doi.org/10.1038/s41586-020-2933-1>
- 999 Kim, Y., Schumaker, K.S., Zhu, J.-K., 2006. EMS mutagenesis of Arabidopsis. In: Salinas, J.,  
1000 Sanchez-Serrano, J.J. (eds) *Arabidopsis protocols. Methods in Molecular Biology* 323,  
1001 101–103. <https://doi.org/10.1385/1-59745-003-0:101>

- 1002 Kriechbaumer, V., Botchway, S.W., Slade, S.E., Knox, K., Frigerio, L., Oparka, K.J., Hawes, C.,  
1003 2015. Reticulomics: Protein-protein interaction studies with two plasmodesmata-  
1004 localised reticulon family proteins identify binding partners enriched at plasmodesmata,  
1005 ER and the plasma membrane. *Plant Physiology* 169, 1933-1945.  
1006 <https://doi.org/10.1104/pp.15.01153>
- 1007 Lee, E., Santana, B.V.N., Samuels, E., Benitez-Fuente, F., Corsi, E., Botella, M.A., Perez-  
1008 Sancho, J., Vanneste, S., Friml, J., Macho, A., Azevedo, A.A., Rosado, A., 2020. Rare  
1009 earth elements induce cytoskeleton-dependent and PI4P-associated rearrangement of  
1010 SYT1/SYT5 endoplasmic reticulum-plasma membrane contact site complexes in  
1011 Arabidopsis. *Journal of Experimental Botany* 71, 3986–3998.  
1012 <https://doi.org/10.1093/jxb/eraa138>
- 1013 Lee, E., Vanneste, S., Pérez-Sancho, J., Benitez-Fuente, F., Strelau, M., Macho, A.P., Botella,  
1014 M.A., Friml, J., Rosado, A., 2019. Ionic stress enhances ER–PM connectivity via  
1015 phosphoinositide-associated SYT1 contact site expansion in Arabidopsis. *Proceedings*  
1016 *of the National Academy of Sciences* 116, 1420–1429.  
1017 <https://doi.org/10.1073/pnas.1818099116>
- 1018 Levy, A., Zheng, J.Y., Lazarowitz, S.G., 2015. Synaptotagmin SYTA forms ER-plasma  
1019 membrane junctions that are recruited to plasmodesmata for plant virus movement.  
1020 *Current Biology* 25, 2018–2025. <https://doi.org/10.1016/j.cub.2015.06.015>
- 1021 Li, C., Qian, T., He, R., Wan, C., Liu, Y., Yu, H., 2021. Endoplasmic reticulum–plasma  
1022 membrane contact sites: Regulators, mechanisms, and physiological functions. *Frontiers*  
1023 *in Cell and Developmental Biology* 9, 126. <https://doi.org/10.3389/fcell.2021.627700>
- 1024 Li, H., Handsaker, B., Wysoker, A., Fennell, T., Ruan, J., Homer, N., Marth, G., Abecasis, G.,  
1025 Durbin, R., 1000 Genome Project Data Processing Subgroup, 2009. The sequence  
1026 alignment/map format and SAMtools. *Bioinformatics* 25, 2078–2079.  
1027 <https://doi.org/10.1093/bioinformatics/btp352>
- 1028 Maksaev, G., Haswell, E.S., 2012. MscS-Like10 is a stretch-activated ion channel from  
1029 Arabidopsis thaliana with a preference for anions. *Proceedings of the National Academy*  
1030 *of Sciences* 109, 19015–19020. <https://doi.org/10.1073/pnas.1213931109>
- 1031 Maksaev, G., Shoots, J.M., Ohri, S., Haswell, E.S., 2018. Nonpolar residues in the presumptive  
1032 pore-lining helix of mechanosensitive channel MSL10 influence channel behavior and  
1033 establish a nonconducting function. *Plant Direct* 2, 1–13. <https://doi.org/10.1002/pld3.59>

- 1034 Manford, A.G., Stefan, C.J., Yuan, H.L., MacGurn, J.A., Emr, S.D., 2012. ER-to-plasma  
1035 membrane tethering proteins regulate cell signaling and ER morphology. *Developmental*  
1036 *Cell* 23, 1129-1140. <https://doi.org/10.1016/j.devcel.2012.11.004>
- 1037 Meinke, D.W., 2013. A survey of dominant mutations in *Arabidopsis thaliana*. *Trends in Plant*  
1038 *Science* 18, 84–91. <https://doi.org/10.1016/j.tplants.2012.08.006>
- 1039 Mielecki, J., Gawroński, P., Karpiński, S., 2020. Retrograde Signaling: Understanding the  
1040 communication between organelles. *International Journal of Molecular Sciences*. 21,  
1041 6173. <https://doi.org/10.3390/ijms21176173>
- 1042 Min, S.-W., Chang, W.-P., Südhof, T.C., 2007. E-Syts, a family of membranous Ca<sup>2+</sup>-sensor  
1043 proteins with multiple C2 domains. *Proceedings of the National Academy of Sciences*  
1044 104, 3823–3828. <https://doi.org/10.1073/pnas.0611725104>
- 1045 Moe-Lange, J., Gappel, N.M., Machado, M., Wudick, M.M., Sies, C.S.A., Schott-Verdugo, S.N.,  
1046 Bonus, M., Mishra, S., Hartwig, T., Bezruczyk, M., Basu, D., Farmer, E.E., Gohlke, H.,  
1047 Malkovskiy, A., Haswell, E.S., Lercher, M.J., Ehrhardt, D.W., Frommer, W.B., Kleist,  
1048 T.J., 2021. Interdependence of a mechanosensitive anion channel and glutamate  
1049 receptors in distal wound signaling. *Science Advances* 7, eabg4298.  
1050 <https://doi.org/10.1126/sciadv.abg4298>
- 1051 Mosblech, A., König, S., Stenzel, I., Grzeganeck, P., Feussner, I., Heilmann, I., 2008.  
1052 Phosphoinositide and inositolpolyphosphate signalling in defense responses of  
1053 *Arabidopsis thaliana* challenged by mechanical wounding. *Molecular Plant* 1, 249–261.  
1054 <https://doi.org/10.1093/mp/ssm028>
- 1055 Obrdlik, P., El-Bakkoury, M., Hamacher, T., Cappellaro, C., Vilarino, C., Fleischer, C., Ellerbrok,  
1056 H., Kamuzinzi, R., Ledent, V., Blaudez, D., Sanders, D., Revuelta, J.L., Boles, E., Andre,  
1057 B., 2004. K<sup>+</sup> channel interactions detected by a genetic system optimized for systematic  
1058 studies of membrane protein interactions. *Proceedings of the National Academy of*  
1059 *Sciences* 101, 12242–12247.
- 1060 O'Connell, K.M.S., Loftus, R., Tamkun, M.M., 2010. Localization-dependent activity of the Kv2.1  
1061 delayed-rectifier K<sup>+</sup> channel. *Proceedings of the National Academy of Sciences* 107,  
1062 12351–12356. <https://doi.org/10.1073/pnas.1003028107>
- 1063 Pérez-Sancho, J., Vanneste, S., Lee, E., McFarlane, H.E., Esteban del Valle, A., Valpuesta, V.,  
1064 Friml, J., Botella, M.A., Rosado, A., 2015. The *Arabidopsis* synaptotagmin1 is enriched  
1065 in endoplasmic reticulum-plasma membrane contact sites and confers cellular resistance  
1066 to mechanical stresses. *Plant Physiology* 168, 132–143.  
1067 <https://doi.org/10.1104/pp.15.00260>

- 1068 Prinz, W.A., Toulmay, A., Balla, T., 2020. The functional universe of membrane contact sites.  
1069 Nature Reviews Molecular Cell Biology 21, 7–24. [https://doi.org/10.1038/s41580-019-](https://doi.org/10.1038/s41580-019-0180-9)  
1070 0180-9
- 1071 Qian, T., Li, C., He, R., Wan, C., Liu, Y., Yu, H., 2021. Calcium-dependent and -independent  
1072 lipid transfer mediated by tricalbins in yeast. Journal of Biological Chemistry 296,  
1073 100729. <https://doi.org/10.1016/j.jbc.2021.100729>
- 1074 Quon, E., Nenadic, A., Zaman, M.F., Johansen, J., Beh, C.T., 2022. ER-PM membrane contact  
1075 site regulation by yeast ORPs and membrane stress pathways. PLOS Genetics 18,  
1076 e1010106. <https://doi.org/10.1371/journal.pgen.1010106>
- 1077 Quon, E., Sere, Y.Y., Chauhan, N., Johansen, J., Sullivan, D.P., Dittman, J.S., Rice, W.J.,  
1078 Chan, R.B., Paolo, G.D., Beh, C.T., Menon, A.K., 2018. Endoplasmic reticulum-plasma  
1079 membrane contact sites integrate sterol and phospholipid regulation. PLOS Biology 16,  
1080 e2003864. <https://doi.org/10.1371/journal.pbio.2003864>
- 1081 Ruiz-Lopez, N., Pérez-Sancho, J., del Valle, A.E., Haslam, R.P., Vanneste, S., Catalá, R.,  
1082 Perea-Resa, C., Damme, D.V., García-Hernández, S., Albert, A., Vallarino, J., Lin, J.,  
1083 Friml, J., Macho, A.P., Salinas, J., Rosado, A., Napier, J.A., Amorim-Silva, V., Botella,  
1084 M.A., 2021. Synaptotagmins at the endoplasmic reticulum–plasma membrane contact  
1085 sites maintain diacylglycerol homeostasis during abiotic stress. The Plant Cell 33, 2431–  
1086 2453. <https://doi.org/10.1093/plcell/koab122>
- 1087 Saheki, Y., Bian, X., Schauder, C.M., Sawaki, Y., Surma, M.A., Klose, C., Pincet, F., Reinisch,  
1088 K.M., De Camilli, P., 2016. Control of plasma membrane lipid homeostasis by the  
1089 extended synaptotagmins. Nature Cell Biology 18, 504–515.  
1090 <https://doi.org/10.1038/ncb3339>
- 1091 Sampaio, M., Neves, J., Cardoso, T., Pissarra, J., Pereira, S., Pereira, C., 2022. Coping with  
1092 abiotic stress in plants—An endomembrane trafficking perspective. Plants 11, 338.  
1093 <https://doi.org/10.3390/plants11030338>
- 1094 Saravanan, R.S., Slabaugh, E., Singh, V.R., Lapidus, L.J., Haas, T., Brandizzi, F., 2009. The  
1095 targeting of the oxysterol-binding protein ORP3a to the endoplasmic reticulum relies on  
1096 the plant VAP33 homolog PVA12. The Plant Journal 58, 817–830.  
1097 <https://doi.org/10.1111/j.1365-313X.2009.03815.x>
- 1098 Schapire, A.L., Voigt, B., Jásik, J., Rosado, A., Lopez-Cobollo, R., Menzel, D., Salinas, J.,  
1099 Mancuso, S., Valpuesta, V., Baluska, F., Botella, M.A., 2008. Arabidopsis synaptotagmin  
1100 1 Is Required for the maintenance of plasma membrane integrity and cell viability. Plant  
1101 Cell 20, 3374–3388. <https://doi.org/10.1105/tpc.108.063859>

- 1102 Schindelin, J., Arganda-Carreras, I., Frise, E., Kaynig, V., Longair, M., Pietzsch, T., Preibisch,  
1103 S., Rueden, C., Saalfeld, S., Schmid, B., Tinevez, J.-Y., White, D.J., Hartenstein, V.,  
1104 Eliceiri, K., Tomancak, P., Cardona, A., 2012. Fiji: an open-source platform for  
1105 biological-image analysis. *Nature Methods* 9, 676–682.  
1106 <https://doi.org/10.1038/nmeth.2019>
- 1107 Schrader, M., Godinho, L., Costello, J., Islinger, M., 2015. The different facets of organelle  
1108 interplay—an overview of organelle interactions. *Frontiers in Cell and Developmental*  
1109 *Biology* 3, 56. doi: 10.3389/fcell.2015.00056
- 1110 Schulz, T.A., Creutz, C.E., 2004. The tricalbin C2 domains: lipid-binding properties of a novel,  
1111 synaptotagmin-like yeast protein family. *Biochemistry* 43, 3987–3995.  
1112 <https://doi.org/10.1021/bi036082w>
- 1113 Scorrano, L., Matteis, M.A., Emr, S., Giordano, F., Hajnóczky, G., Kornmann, B., Lackner, L.L.,  
1114 Levine, T.P., Pellegrini, L., Reinisch, K., Rizzuto, R., Simmen, T., Stenmark, H.,  
1115 Ungermann, C., Schuldiner, M., 2019. Coming together to define membrane contact  
1116 sites. *Nature Communications* 10, 1287. <https://doi.org/10.1038/s41467-019-09253-3>
- 1117 Siao, W., Wang, P., Voigt, B., Hussey, P.J., Baluska, F., 2016. Arabidopsis SYT1 maintains  
1118 stability of cortical endoplasmic reticulum networks and VAP27-1-enriched endoplasmic  
1119 reticulum–plasma membrane contact sites. *Journal of Experimental Botany* 67, 6161–  
1120 6171. <https://doi.org/10.1093/jxb/erw381>
- 1121 Silva, J.C., Gorenstein, M.V., Li, G.-Z., Vissers, J.P.C., Geromanos, S.J., 2006. Absolute  
1122 quantification of proteins by LCMSE: a virtue of parallel MS acquisition. *Molecular Cell*  
1123 *Proteomics* 5, 144–156. <https://doi.org/10.1074/mcp.M500230-MCP200>
- 1124 Stefano, G., Renna, L., Wormsbaecher, C., Gamble, J., Zienkiewicz, K., Brandizzi, F., 2018.  
1125 Plant endocytosis requires the ER membrane-anchored proteins VAP27-1 and VAP27-3.  
1126 *Cell Reports* 23, 2299–2307. <https://doi.org/10.1016/j.celrep.2018.04.091>
- 1127 Sun, Y., Hays, N.M., Periasamy, A., Davidson, M.W., Day, R.N., 2012. Monitoring protein  
1128 interactions in living cells with fluorescence lifetime imaging microscopy. *Methods in*  
1129 *Enzymology* 504, 371–391. <https://doi.org/10.1016/B978-0-12-391857-4.00019-7>
- 1130 The UniProt Consortium, 2021. UniProt: the universal protein knowledgebase in 2021. *Nucleic*  
1131 *Acids Research* 49, D480–D489. <https://doi.org/10.1093/nar/gkaa1100>
- 1132 Thole, J.M., Beisner, E.R., Liu, J., Venkova, S.V., Strader, L.C., 2014. Abscisic acid regulates  
1133 root elongation through the activities of auxin and ethylene in *Arabidopsis thaliana*. *G3*  
1134 *Genes|Genomes|Genetics* 4, 1259–1274. <https://doi.org/10.1534/g3.114.011080/-/DC1>



- 1135 Tyanova, S., Temu, T., Sinitcyn, P., Carlson, A., Hein, M.Y., Geiger, T., Mann, M., Cox, J.,  
1136 2016. The Perseus computational platform for comprehensive analysis of (prote)omics  
1137 data. *Nature Methods* 13, 731–740. <https://doi.org/10.1038/nmeth.3901>
- 1138 van Wersch, R., Li, X., Zhang, Y., 2016. Mighty dwarfs: Arabidopsis autoimmune mutants and  
1139 their usages in genetic dissection of plant immunity. *Frontiers in Plant Science* 7, 369–8.  
1140 <https://doi.org/10.3389/fpls.2016.01717>
- 1141 Veley, K.M., Maksaev, G., Frick, E.M., January, E., Kloepper, S.C., Haswell, E.S., 2014.  
1142 Arabidopsis MSL10 has a regulated cell death signaling activity that is separable from its  
1143 mechanosensitive ion channel activity. *The Plant Cell* 26, 3115–3131.  
1144 <https://doi.org/10.1105/tpc.114.128082>
- 1145 Waadt, R., Kudla, J., 2008. In planta visualization of protein interactions using bimolecular  
1146 fluorescence complementation (BiFC). *Cold Spring Harbor Protocols* 2008,  
1147 [doi.org/10.1101/pdb.prot4995](https://doi.org/10.1101/pdb.prot4995)
- 1148 Wang, P., Hawes, C., Hussey, P.J., 2017. Plant endoplasmic reticulum–plasma membrane  
1149 contact sites. *Trends in Plant Science* 22, 289–297.  
1150 <https://doi.org/10.1016/j.tplants.2016.11.008>
- 1151 Wang, P., Hawkins, T.J., Richardson, C., Cummins, I., Deeks, M.J., Sparkes, I., Hawes, C.,  
1152 Hussey, P.J., 2014. The plant cytoskeleton, NET3C, and VAP27 mediate the link  
1153 between the plasma membrane and endoplasmic reticulum. *Current Biology* 24, 1397–  
1154 1405. <https://doi.org/10.1016/j.cub.2014.05.003>
- 1155 Wang, P., Pleskot, R., Zang, J., Winkler, J., Wang, J., Yperman, K., Zhang, T., Wang, K., Gong,  
1156 J., Guan, Y., Richardson, C., Duckney, P., Vandorpe, M., Mylle, E., Fiserova, J., Van  
1157 Damme, D., Hussey, P.J., 2019. Plant AtEH/Pan1 proteins drive autophagosome  
1158 formation at ER-PM contact sites with actin and endocytic machinery. *Nature*  
1159 *Communications* 10, 5132. <https://doi.org/10.1038/s41467-019-12782-6>
- 1160 Wang, P., Richardson, C., Hawkins, T.J., Sparkes, I., Hawes, C., Hussey, P.J., 2016. Plant  
1161 VAP27 proteins: domain characterization, intracellular localization and role in plant  
1162 development. *New Phytologist* 210, 1311–1326. <https://doi.org/10.1111/nph.13857>
- 1163 Winter, D., Vinegar, B., Nahal, H., Ammar, R., Wilson, G.V., Provart, N.J., 2007. An “Electronic  
1164 Fluorescent Pictograph” browser for exploring and analyzing large-scale biological data  
1165 sets. *PLOS ONE* 2, e718. <https://doi.org/10.1371/journal.pone.0000718>
- 1166 Yamazaki, T., Kawamura, Y., Minami, A., Uemura, M., 2008. Calcium-dependent freezing  
1167 tolerance in Arabidopsis involves membrane resealing via synaptotagmin SYT1. *The*  
1168 *Plant Cell* 20, 3389–3404. <https://doi.org/10.1105/tpc.108.062679>

- 1169 Zaman, M.F., Nenadic, A., Radojičić, A., Rosado, A., Beh, C.T., 2020. Sticking with it: ER-PM  
1170 membrane contact sites as a coordinating nexus for regulating lipids and proteins at the  
1171 cell cortex. *Frontiers in Cell and Developmental Biology* 8, 675.  
1172 <https://doi.org/10.3389/fcell.2020.00675>
- 1173 Zang, J., Klemm, S., Pain, C., Duckney, P., Bao, Z., Stamm, G., Kriechbaumer, V.,  
1174 Bürstenbinder, K., Hussey, P.J., Wang, P., 2021. A novel plant actin-microtubule  
1175 bridging complex regulates cytoskeletal and ER structure at ER-PM contact sites.  
1176 *Current Biology* 31, 1251-1260. <https://doi.org/10.1016/j.cub.2020.12.009>
- 1177 Zou, Y., Chintamanani, S., He, P., Fukushige, H., Yu, L., Shao, M., Zhu, L., Hildebrand, D.F.,  
1178 Tang, X., Zhou, J.-M., 2016. A gain-of-function mutation in Msl10 triggers cell death and  
1179 wound-induced hyperaccumulation of jasmonic acid in *Arabidopsis*. *Journal of*  
1180 *Integrative Plant Biology* 58, 600–609. <https://doi.org/10.1111/jipb.12427>
